# Supplementary material
Source: publisher figshare collection journal article supplement (https://gsapubs.figshare.com/articles/dataset/_/12531233)
Supplement: Supplementary file 1 [file 1]

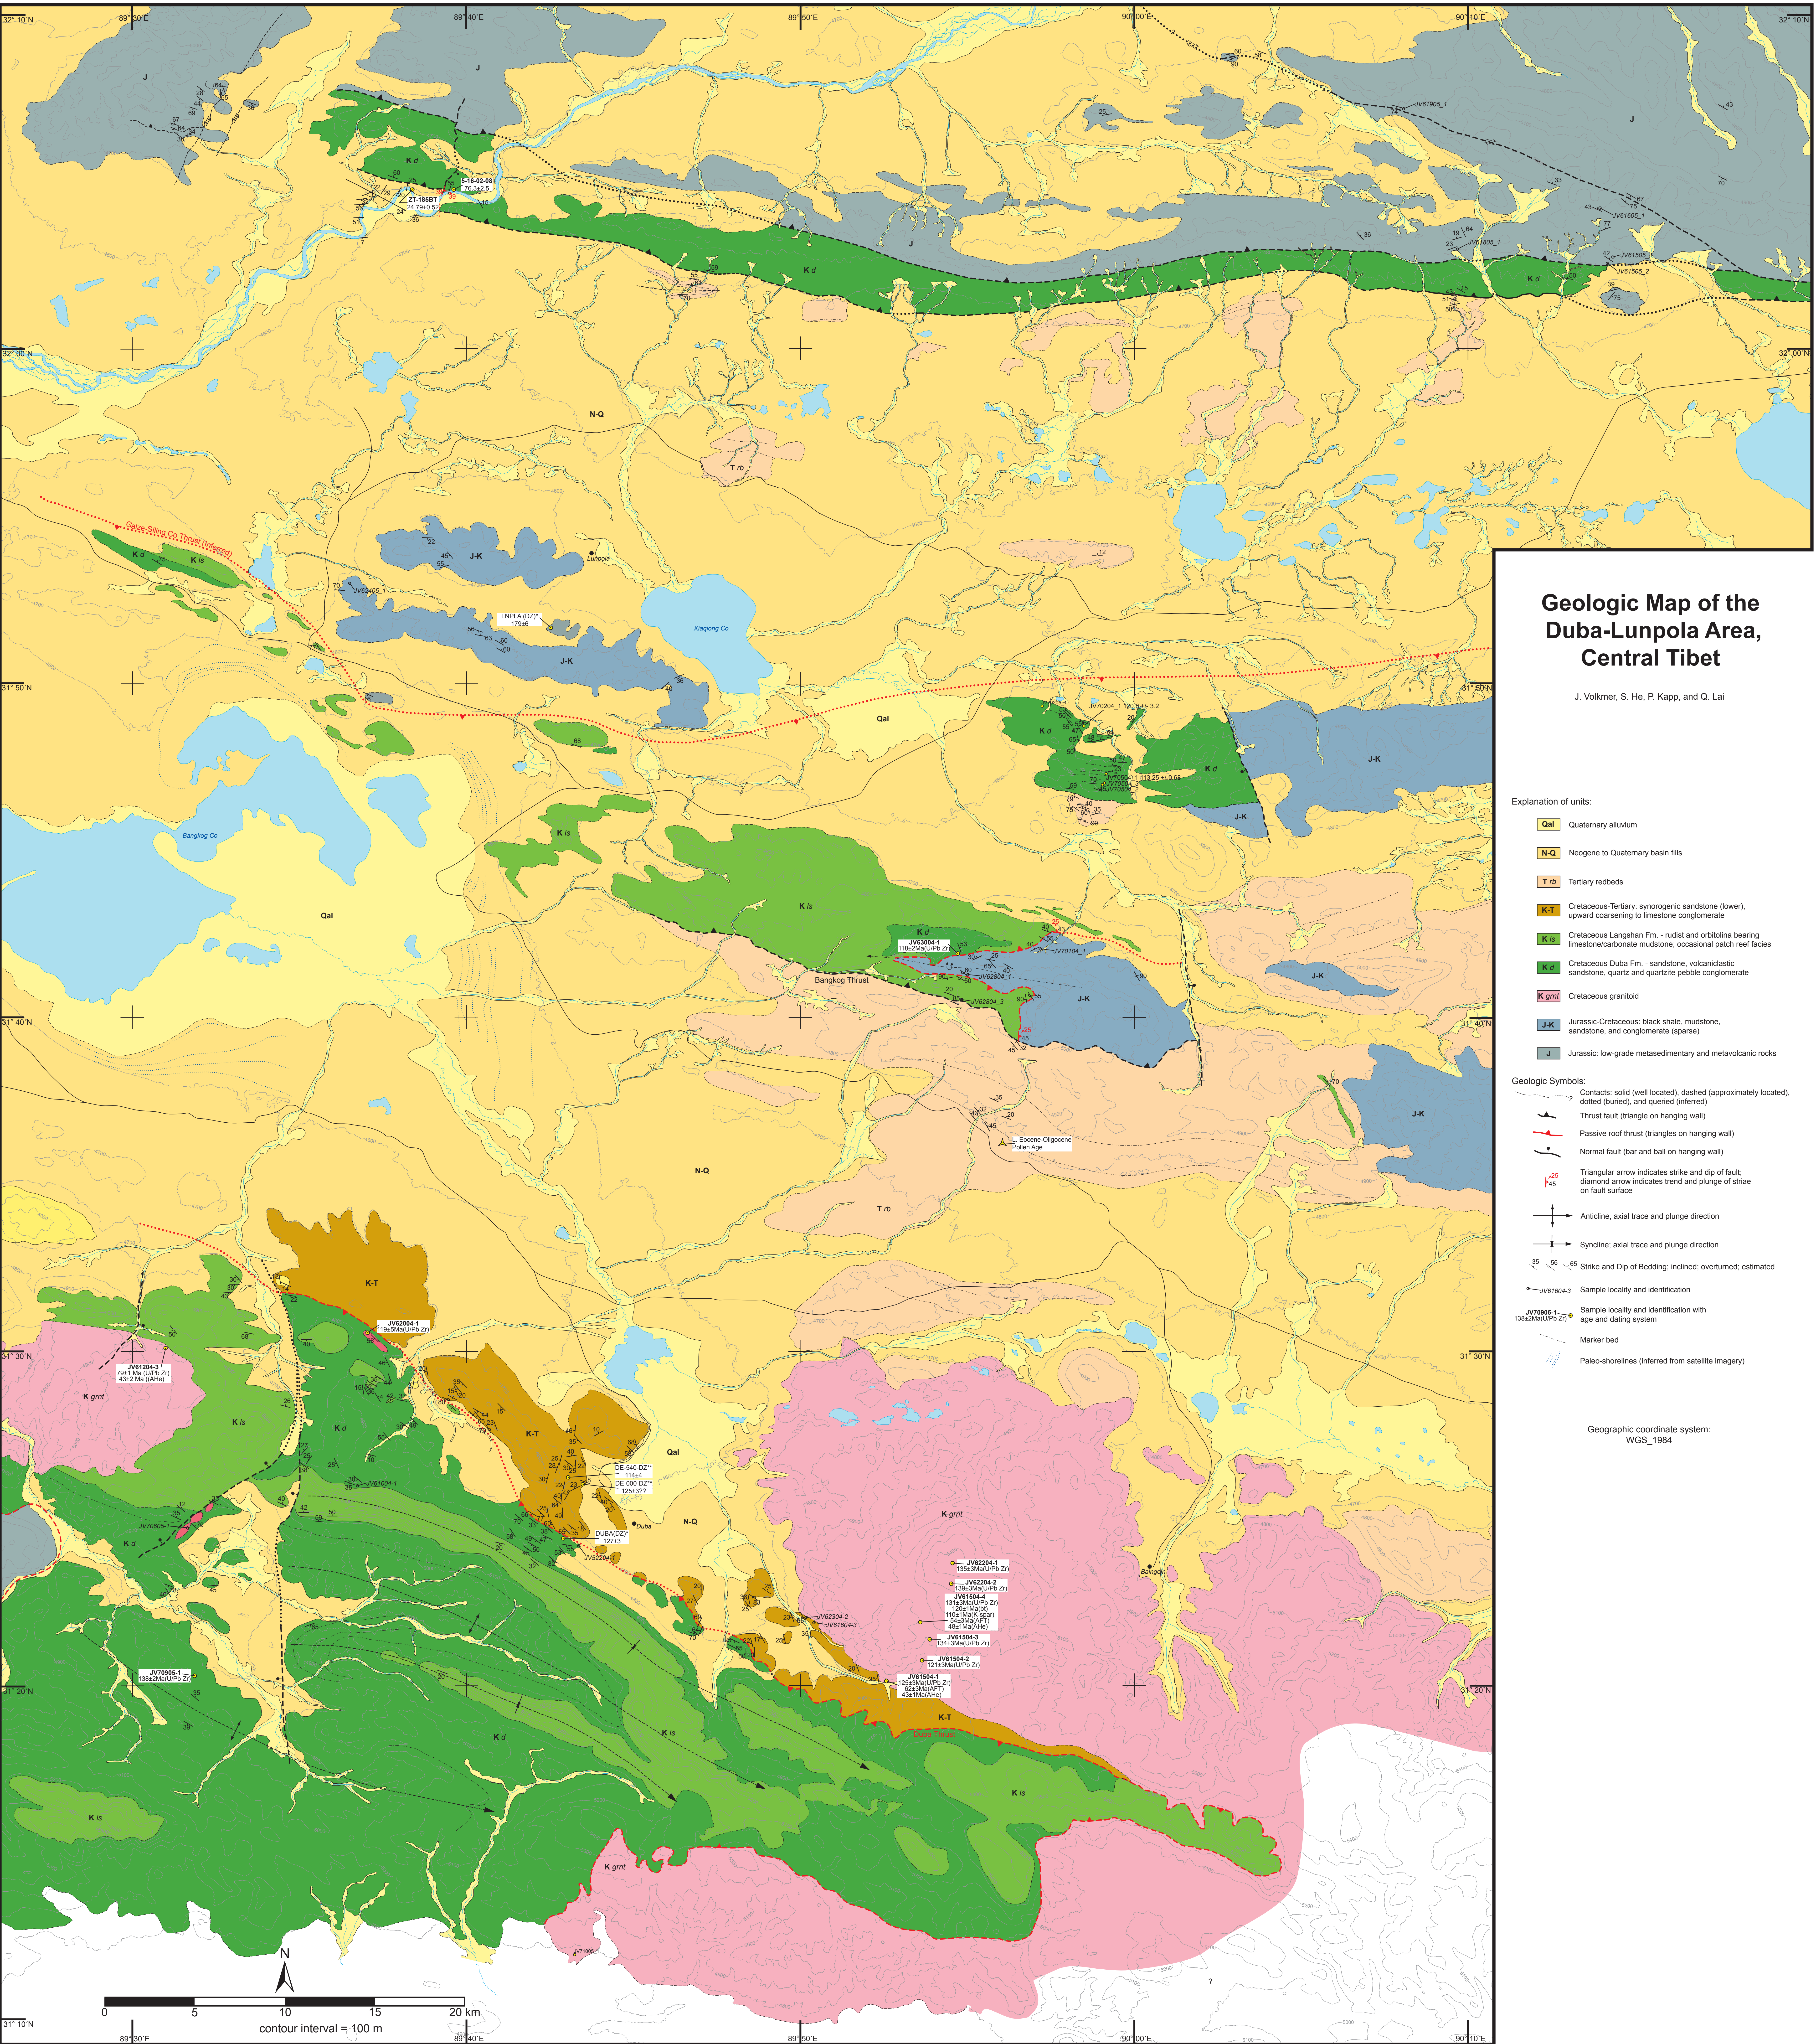

# Geologic Map of the Duba-Lunpola Area, Central Tibet

J. Volkmer, S. He, P. Kapp, and Q. Lai

## Explanation of units:

- Qal** Quaternary alluvium
- N-Q** Neogene to Quaternary basin fills
- T rb** Tertiary redbeds
- K-T** Cretaceous-Tertiary: synorogenic sandstone (lower), upward coarsening to limestone conglomerate
- K ls** Cretaceous Langshan Fm. - rudist and orbitolina bearing limestone/carbonate mudstone, occasional patch reef facies
- K d** Cretaceous Duba Fm. - sandstone, volcanoclastic sandstone, quartz and quartzite pebble conglomerate
- K gmt** Cretaceous granite
- J-K** Jurassic-Cretaceous: black shale, mudstone, sandstone, and conglomerate (sparse)
- J** Jurassic: low-grade metasedimentary and metavolcanic rocks

## Geologic Symbols:

- Contacts: solid (well located), dashed (approximately located), dotted (buried), and queried (inferred)
- Thrust fault (triangle on hanging wall)
- Passive roof thrust (triangles on hanging wall)
- Normal fault (bar and ball on hanging wall)
- Triangular arrow indicates strike and dip of fault; diamond arrow indicates trend and plunge of striae on fault surface
- Anticline; axial trace and plunge direction
- Syncline; axial trace and plunge direction
- Strike and Dip of Bedding; inclined: overturned; estimated
- Sample locality and identification
- Sample locality and identification with age and dating system
- Marker bed
- Paleo-shorelines (inferred from satellite imagery)

Geographic coordinate system:  
WGS\_1984



Excel file (from PDF file below) here.

| Table DR1. U-Pb zircon geochronologic analyses by Laser-Ablation Multicollector ICP Mass Spectrometry |       |        |      |         |      |         |     |       |        |      |        |      |        |                    |          |      |  |
|-------------------------------------------------------------------------------------------------------|-------|--------|------|---------|------|---------|-----|-------|--------|------|--------|------|--------|--------------------|----------|------|--|
| Isotopic ratios                                                                                       |       |        |      |         |      |         |     |       |        |      |        |      |        | Apparent ages (Ma) |          |      |  |
| Analysis                                                                                              | U     | 206Pb  | U/Th | 207Pb*  | ±    | 206Pb*  | ±   | error | 206Pb* | ±    | 207Pb* | ±    | 206Pb* | ±                  | Best age | ±    |  |
|                                                                                                       | (ppm) | 204Pb  |      | 235U    | (%)  | 238U    | (%) | corr. | 238U   | (Ma) | 235U   | (Ma) | 207Pb* | (Ma)               | (Ma)     | (Ma) |  |
| Sample JV61504-1                                                                                      |       |        |      |         |      |         |     |       |        |      |        |      |        |                    |          |      |  |
| <b>standard</b>                                                                                       | 438   | 36282  | 4.6  | 0.72716 | 7.6  | 0.09083 | 2.5 | 0.33  | 560.4  | 13.2 | 554.9  | 32.3 | 532.1  | 156.6              | 560.4    | 13.2 |  |
| <b>standard</b>                                                                                       | 359   | 39191  | 4.9  | 0.75977 | 5.0  | 0.09158 | 1.9 | 0.38  | 564.9  | 10.4 | 573.9  | 21.9 | 609.6  | 100.0              | 564.9    | 10.4 |  |
| <b>standard</b>                                                                                       | 193   | 19769  | 5.0  | 0.76326 | 8.4  | 0.09381 | 4.0 | 0.48  | 578.1  | 22.4 | 575.9  | 37.1 | 567.3  | 161.5              | 578.1    | 22.4 |  |
| <b>standard</b>                                                                                       | 415   | 82057  | 4.7  | 0.73235 | 5.4  | 0.09074 | 2.0 | 0.37  | 559.9  | 10.8 | 557.9  | 23.3 | 549.8  | 109.9              | 559.9    | 10.8 |  |
| JV61504-1-01                                                                                          | 478   | 5034   | 4.2  | 0.17117 | 16.9 | 0.01953 | 3.6 | 0.21  | 124.7  | 4.4  | 160.4  | 25.1 | 727.6  | 352.9              | 124.7    | 4.4  |  |
| JV61504-1-03                                                                                          | 378   | 2710   | 7.0  | 0.18586 | 21.1 | 0.01813 | 4.0 | 0.19  | 115.9  | 4.6  | 173.1  | 33.5 | 1050.6 | 420.8              | 115.9    | 4.6  |  |
| JV61504-1-04                                                                                          | 358   | 14703  | 5.0  | 0.19191 | 27.9 | 0.02141 | 3.2 | 0.11  | 136.5  | 4.3  | 178.3  | 45.7 | 774.8  | 594.4              | 136.5    | 4.3  |  |
| JV61504-1-05                                                                                          | 442   | 30178  | 2.2  | 0.15548 | 23.8 | 0.01993 | 5.8 | 0.24  | 127.2  | 7.3  | 146.7  | 32.6 | 475.6  | 516.9              | 127.2    | 7.3  |  |
| <b>standard</b>                                                                                       | 314   | 119061 | 5.1  | 0.76069 | 6.4  | 0.09264 | 4.1 | 0.64  | 571.1  | 22.2 | 574.4  | 27.9 | 587.4  | 106.4              | 571.1    | 22.2 |  |
| JV61504-1-06                                                                                          | 511   | 23102  | 2.9  | 0.14892 | 18.9 | 0.01971 | 3.0 | 0.16  | 125.8  | 3.7  | 141.0  | 24.9 | 404.5  | 420.9              | 125.8    | 3.7  |  |
| JV61504-1-07                                                                                          | 1137  | 208157 | 5.5  | 1.21034 | 2.2  | 0.11959 | 1.8 | 0.82  | 728.2  | 12.3 | 805.3  | 12.1 | 1025.1 | 25.1               | 728.2    | 12.3 |  |
| JV61504-1-08                                                                                          | 166   | 6202   | 1.4  | 0.20191 | 46.0 | 0.02004 | 8.5 | 0.19  | 127.9  | 10.8 | 186.7  | 78.7 | 1016.4 | 966.8              | 127.9    | 10.8 |  |
| <b>standard</b>                                                                                       | 405   | 122706 | 4.8  | 0.74683 | 6.2  | 0.08914 | 2.5 | 0.40  | 550.4  | 13.0 | 566.4  | 27.1 | 630.9  | 123.5              | 550.4    | 13.0 |  |
| JV61504-1-09                                                                                          | 517   | 31835  | 7.3  | 0.16415 | 10.7 | 0.01955 | 1.8 | 0.17  | 124.8  | 2.2  | 154.3  | 15.3 | 635.4  | 227.1              | 124.8    | 2.2  |  |
| JV61504-1-10                                                                                          | 259   | 8653   | 1.6  | 0.11189 | 38.9 | 0.02029 | 4.6 | 0.12  | 129.5  | 5.9  | 107.7  | 39.8 | -351.0 | 1029.7             | 129.5    | 5.9  |  |
| JV61504-1-11                                                                                          | 820   | 4233   | 6.2  | 0.11915 | 16.0 | 0.01915 | 3.5 | 0.22  | 122.3  | 4.2  | 114.3  | 17.3 | -48.5  | 381.9              | 122.3    | 4.2  |  |
| <b>standard</b>                                                                                       | 347   | 52922  | 4.9  | 0.73688 | 7.7  | 0.09158 | 2.5 | 0.33  | 564.9  | 13.7 | 560.6  | 33.1 | 543.2  | 159.0              | 564.9    | 13.7 |  |
| JV61504-1-12                                                                                          | 502   | 7392   | 6.6  | 0.16826 | 17.6 | 0.01998 | 2.4 | 0.13  | 127.5  | 3.0  | 157.9  | 25.8 | 642.0  | 378.5              | 127.5    | 3.0  |  |
| JV61504-1-13                                                                                          | 866   | 12918  | 8.8  | 0.13887 | 10.8 | 0.01957 | 2.5 | 0.23  | 124.9  | 3.1  | 132.0  | 13.4 | 261.5  | 243.0              | 124.9    | 3.1  |  |
| JV61504-1-14                                                                                          | 780   | 16881  | 9.3  | 0.14379 | 17.2 | 0.01923 | 2.7 | 0.16  | 122.8  | 3.3  | 136.4  | 22.0 | 380.4  | 384.5              | 122.8    | 3.3  |  |
| <b>standard</b>                                                                                       | 312   | 3766   | 5.0  | 0.72394 | 12.6 | 0.09288 | 3.1 | 0.24  | 572.6  | 16.9 | 553.0  | 54.0 | 473.2  | 272.1              | 572.6    | 16.9 |  |
| JV61504-1-15                                                                                          | 614   | 7814   | 10.0 | 0.15643 | 12.0 | 0.01950 | 2.2 | 0.18  | 124.5  | 2.7  | 147.6  | 16.5 | 536.4  | 259.4              | 124.5    | 2.7  |  |
| JV61504-1-16                                                                                          | 189   | 5015   | 2.4  | 0.26070 | 26.4 | 0.02053 | 5.3 | 0.20  | 131.0  | 6.9  | 235.2  | 55.4 | 1469.0 | 498.8              | 131.0    | 6.9  |  |
| JV61504-1-17                                                                                          | 389   | 777    | 1.2  | 0.13048 | 28.3 | 0.01935 | 5.3 | 0.19  | 123.5  | 6.5  | 124.5  | 33.2 | 143.7  | 664.4              | 123.5    | 6.5  |  |
| JV61504-1-18                                                                                          | 508   | 14660  | 2.8  | 0.16071 | 19.0 | 0.01940 | 6.2 | 0.33  | 123.8  | 7.6  | 151.3  | 26.7 | 606.7  | 391.4              | 123.8    | 7.6  |  |
| JV61504-1-19                                                                                          | 405   | 24343  | 2.4  | 0.13761 | 20.7 | 0.01983 | 3.1 | 0.15  | 126.6  | 3.9  | 130.9  | 25.4 | 210.2  | 478.0              | 126.6    | 3.9  |  |
| JV61504-1-20                                                                                          | 207   | 13543  | 1.4  | 0.21889 | 26.6 | 0.01983 | 5.5 | 0.21  | 126.6  | 6.9  | 201.0  | 48.6 | 1198.4 | 523.0              | 126.6    | 6.9  |  |
| <b>standard</b>                                                                                       | 464   | 114605 | 4.6  | 0.71021 | 5.4  | 0.08910 | 3.2 | 0.59  | 550.2  | 16.9 | 544.9  | 22.9 | 522.6  | 96.0               | 550.2    | 16.9 |  |
| JV61504-1-21                                                                                          | 355   | 25958  | 1.7  | 0.16773 | 22.4 | 0.01900 | 2.9 | 0.13  | 121.3  | 3.4  | 157.4  | 32.7 | 743.0  | 475.6              | 121.3    | 3.4  |  |
| JV61504-1-22                                                                                          | 571   | 22480  | 1.6  | 0.15079 | 14.2 | 0.01965 | 2.7 | 0.19  | 125.4  | 3.4  | 142.6  | 18.9 | 438.6  | 311.4              | 125.4    | 3.4  |  |
| JV61504-1-24                                                                                          | 662   | 56738  | 9.4  | 0.16989 | 11.6 | 0.02062 | 5.3 | 0.46  | 131.6  | 6.9  | 159.3  | 17.1 | 595.0  | 224.2              | 131.6    | 6.9  |  |
| JV61504-1-25                                                                                          | 758   | 53793  | 8.3  | 0.14366 | 12.2 | 0.01875 | 2.5 | 0.20  | 119.7  | 2.9  | 136.3  | 15.5 | 435.6  | 266.6              | 119.7    | 2.9  |  |
| JV61504-1-26                                                                                          | 511   | 22919  | 0.9  | 0.16606 | 12.5 | 0.02013 | 3.0 | 0.24  | 128.4  | 3.8  | 156.0  | 18.1 | 597.9  | 264.7              | 128.4    | 3.8  |  |
| <b>standard</b>                                                                                       | 342   | 112645 | 4.7  | 0.73591 | 8.6  | 0.09023 | 2.2 | 0.26  | 556.9  | 12.0 | 560.0  | 37.2 | 572.6  | 181.7              | 556.9    | 12.0 |  |
| JV61504-1-27                                                                                          | 673   | 65929  | 2.1  | 0.15369 | 14.7 | 0.01960 | 3.3 | 0.22  | 125.1  | 4.0  | 145.2  | 19.9 | 486.3  | 318.7              | 125.1    | 4.0  |  |
| JV61504-1-28                                                                                          | 663   | 6942   | 9.5  | 0.15319 | 13.1 | 0.01931 | 4.3 | 0.33  | 123.3  | 5.3  | 144.7  | 17.7 | 512.6  | 273.2              | 123.3    | 5.3  |  |
| JV61504-1-29                                                                                          | 607   | 42682  | 9.6  | 0.16782 | 12.3 | 0.01907 | 3.0 | 0.24  | 121.8  | 3.6  | 157.5  | 17.9 | 735.6  | 253.0              | 121.8    | 3.6  |  |
| <b>standard</b>                                                                                       | 241   | 48356  | 4.9  | 0.74934 | 9.7  | 0.09216 | 2.5 | 0.26  | 568.3  | 13.8 | 567.8  | 42.2 | 565.9  | 204.3              | 568.3    | 13.8 |  |
| <b>standard</b>                                                                                       | 295   | 22006  | 5.0  | 0.74694 | 5.8  | 0.09240 | 1.6 | 0.28  | 569.7  | 8.9  | 566.4  | 25.0 | 553.4  | 120.6              | 569.7    | 8.9  |  |
| JV61504-1-30                                                                                          | 146   | 17129  | 1.8  | 0.21235 | 35.3 | 0.02097 | 7.1 | 0.20  | 133.8  | 9.4  | 195.5  | 62.8 | 1025.7 | 720.5              | 133.8    | 9.4  |  |
| JV61504-1-31                                                                                          | 245   | 11916  | 2.5  | 0.15383 | 38.4 | 0.01966 | 5.7 | 0.15  | 125.5  | 7.1  | 145.3  | 52.0 | 482.3  | 867.8              | 125.5    | 7.1  |  |
| JV61504-1-32                                                                                          | 612   | 32854  | 6.2  | 0.13204 | 20.0 | 0.01951 | 3.4 | 0.17  | 124.5  | 4.1  | 125.9  | 23.7 | 152.3  | 465.2              | 124.5    | 4.1  |  |
| <b>standard</b>                                                                                       | 181   | 24611  | 5.2  | 0.79862 | 8.7  | 0.09136 | 3.5 | 0.41  | 563.6  | 19.0 | 596.1  | 39.1 | 721.7  | 168.5              | 563.6    | 19.0 |  |
| Sample JV61504-2                                                                                      |       |        |      |         |      |         |     |       |        |      |        |      |        |                    |          |      |  |
| <b>standard</b>                                                                                       | 449   | 674333 | 3.9  | 0.73406 | 5.4  | 0.09188 | 3.6 | 0.67  | 566.6  | 19.7 | 558.9  | 23.4 | 527.7  | 88.8               | 566.6    | 19.7 |  |
| <b>standard</b>                                                                                       | 552   | 248122 | 4.8  | 0.73341 | 3.4  | 0.08977 | 2.4 | 0.73  | 554.2  | 13   | 558.6  | 14.5 | 576.4  | 50.2               | 554.2    | 13   |  |
| <b>standard</b>                                                                                       | 498   | 734070 | 4.5  | 0.74353 | 2.9  | 0.09101 | 2.1 | 0.73  | 561.5  | 11.3 | 564.5  | 12.4 | 576.4  | 42.6               | 561.5    | 11.3 |  |
| <b>standard</b>                                                                                       | 436   | 2E+06  | 3.8  | 0.73497 | 3.2  | 0.08854 | 2.6 | 0.81  | 546.9  | 13.6 | 559.5  | 13.8 | 611.0  | 41.1               | 546.9    | 13.6 |  |
| JV61504-2-01                                                                                          | 616   | 159340 | 5.6  | 0.14252 | 12.0 | 0.01886 | 3.9 | 0.32  | 120.4  | 4.7  | 135.3  | 15.2 | 404.7  | 255.5              | 120.4    | 4.7  |  |
| JV61504-2-02                                                                                          | 750   | 269964 | 5.8  | 0.13354 | 9.6  | 0.01923 | 2.5 | 0.26  | 122.8  | 3.0  | 127.3  | 11.5 | 211.4  | 216.2              | 122.8    | 3.0  |  |
| <b>standard</b>                                                                                       | 473   | 699636 | 4.5  | 0.73635 | 3.2  | 0.09130 | 1.3 | 0.39  | 563.2  | 6.9  | 560.3  | 14.0 | 548.2  | 65.1               | 563.2    | 6.9  |  |
| JV61504-2-04                                                                                          | 850   | 350954 | 11.1 | 0.14260 | 8.5  | 0.02005 | 3.2 | 0.38  | 128.0  | 4.1  | 135.4  | 10.7 | 266.7  | 180.1              | 128.0    | 4.1  |  |
| JV61504-2-06                                                                                          | 800   | 297531 | 3.1  | 0.13209 | 8.7  | 0.01860 | 2.6 | 0.30  | 118.8  | 3.1  | 126.0  | 10.2 | 264.2  | 189.4              | 118.8    | 3.1  |  |
| <b>standard</b>                                                                                       | 214   | 12225  | 4.5  | 0.75405 | 8.1  | 0.09298 | 3.8 | 0.47  | 573.1  | 20.7 | 570.6  | 35.3 | 560.3  | 155.9              | 573.1    | 20.7 |  |

|                 |      |        |      |         |      |         |     |      |       |      |       |      |        |       |        |      |
|-----------------|------|--------|------|---------|------|---------|-----|------|-------|------|-------|------|--------|-------|--------|------|
| <b>standard</b> | 260  | 7810   | 4.4  | 0.73344 | 4.3  | 0.09270 | 2.1 | 0.48 | 571.5 | 11.3 | 558.6 | 18.7 | 506.2  | 84.0  | 571.5  | 11.3 |
| JV61504-2-07    | 954  | 179147 | 4.2  | 0.18852 | 5.0  | 0.02569 | 4.0 | 0.80 | 163.5 | 6.4  | 175.4 | 8.0  | 338.3  | 68.5  | 163.5  | 6.4  |
| JV61504-2-08    | 474  | 53793  | 5.9  | 0.14739 | 11.3 | 0.01996 | 2.5 | 0.22 | 127.4 | 3.1  | 139.6 | 14.8 | 351.8  | 250.3 | 127.4  | 3.1  |
| JV61504-2-09    | 571  | 235000 | 1.5  | 0.13694 | 6.9  | 0.01902 | 3.2 | 0.46 | 121.4 | 3.8  | 130.3 | 8.5  | 295.5  | 141.0 | 121.4  | 3.8  |
| <b>standard</b> | 521  | 418539 | 5.0  | 0.73203 | 2.2  | 0.08941 | 1.6 | 0.73 | 552.1 | 8.7  | 557.7 | 9.6  | 581.0  | 33.5  | 552.1  | 8.7  |
| JV61504-2-10    | 805  | 558810 | 9.7  | 0.14737 | 6.5  | 0.01967 | 2.8 | 0.42 | 125.6 | 3.4  | 139.6 | 8.5  | 385.0  | 133.3 | 125.6  | 3.4  |
| JV61504-2-11    | 1127 | 355040 | 4.7  | 0.13573 | 5.8  | 0.01914 | 2.8 | 0.47 | 122.2 | 3.3  | 129.2 | 7.1  | 260.4  | 118.4 | 122.2  | 3.3  |
| JV61504-2-12    | 512  | 362579 | 5.5  | 0.19462 | 9.0  | 0.02621 | 2.7 | 0.30 | 166.8 | 4.5  | 180.6 | 15.0 | 365.1  | 194.9 | 166.8  | 4.5  |
| <b>standard</b> | 416  | 721401 | 4.5  | 0.76404 | 3.5  | 0.09289 | 1.0 | 0.28 | 572.6 | 5.5  | 576.3 | 15.5 | 591.1  | 73.5  | 572.6  | 5.5  |
| <b>standard</b> | 458  | 396167 | 4.5  | 0.74721 | 4.1  | 0.09154 | 1.5 | 0.37 | 564.6 | 8.1  | 566.6 | 17.6 | 574.5  | 82.0  | 564.6  | 8.1  |
| JV61504-2-13    | 1049 | 398071 | 10.1 | 0.13798 | 5.5  | 0.01943 | 2.6 | 0.46 | 124.1 | 3.1  | 131.2 | 6.8  | 263.3  | 112.3 | 124.1  | 3.1  |
| JV61504-2-14    | 846  | 282482 | 10.1 | 0.13526 | 10.3 | 0.01946 | 2.6 | 0.25 | 124.3 | 3.2  | 128.8 | 12.5 | 213.7  | 231.2 | 124.3  | 3.2  |
| JV61504-2-15    | 1427 | 857961 | 10.9 | 0.13169 | 5.5  | 0.01868 | 2.0 | 0.36 | 119.3 | 2.3  | 125.6 | 6.5  | 246.8  | 119.1 | 119.3  | 2.3  |
| <b>standard</b> | 409  | 693845 | 5.0  | 0.74273 | 5.0  | 0.09108 | 2.3 | 0.45 | 561.9 | 12.2 | 564.0 | 21.8 | 572.3  | 98.1  | 561.9  | 12.2 |
| JV61504-2-16    | 785  | 585236 | 10.6 | 1.46610 | 8.0  | 0.07779 | 7.9 | 0.99 | 482.9 | 36.7 | 916.5 | 48.2 | 2185.6 | 20.2  | 2185.6 | 20.2 |
| JV61504-2-17    | 782  | 913937 | 2.7  | 0.69285 | 7.5  | 0.07768 | 7.0 | 0.94 | 482.3 | 32.7 | 534.5 | 31.1 | 764.1  | 52.5  | 482.3  | 32.7 |
| JV61504-2-18    | 777  | 139160 | 8.5  | 0.12751 | 8.3  | 0.01837 | 2.4 | 0.28 | 117.4 | 2.7  | 121.9 | 9.5  | 210.3  | 184.5 | 117.4  | 2.7  |
| <b>standard</b> | 359  | 5806   | 5.2  | 0.72423 | 4.9  | 0.09232 | 1.7 | 0.36 | 569.3 | 9.5  | 553.2 | 20.7 | 487.4  | 99.9  | 569.3  | 9.5  |
| JV61504-2-19    | 407  | 44835  | 1.8  | 0.14242 | 14.1 | 0.01953 | 3.2 | 0.22 | 124.7 | 3.9  | 135.2 | 17.9 | 323.8  | 313.4 | 124.7  | 3.9  |
| JV61504-2-20    | 391  | 29305  | 1.6  | 0.15407 | 6.2  | 0.01911 | 2.5 | 0.40 | 122.0 | 3.0  | 145.5 | 8.4  | 547.3  | 123.2 | 122.0  | 3.0  |
| JV61504-2-21    | 855  | 99681  | 9.3  | 0.13352 | 10.0 | 0.01826 | 2.2 | 0.22 | 116.6 | 2.6  | 127.3 | 11.9 | 330.3  | 220.7 | 116.6  | 2.6  |
| <b>standard</b> | 347  | 9403   | 4.7  | 0.74728 | 7.4  | 0.09177 | 5.3 | 0.71 | 566.0 | 28.8 | 566.6 | 32.3 | 569.2  | 113.4 | 566.0  | 28.8 |
| JV61504-2-22    | 521  | 102246 | 1.7  | 0.14153 | 11.3 | 0.01829 | 2.6 | 0.23 | 116.8 | 3.0  | 134.4 | 14.2 | 457.5  | 244.5 | 116.8  | 3.0  |
| JV61504-2-23    | 1196 | 81636  | 10.3 | 0.12958 | 5.9  | 0.01874 | 3.6 | 0.62 | 119.7 | 4.3  | 123.7 | 6.9  | 201.6  | 108.3 | 119.7  | 4.3  |
| JV61504-2-24    | 667  | 59609  | 1.1  | 0.13542 | 8.5  | 0.01827 | 3.2 | 0.38 | 116.7 | 3.7  | 129.0 | 10.3 | 361.1  | 177.9 | 116.7  | 3.7  |
| <b>standard</b> | 339  | 395294 | 5.0  | 0.76601 | 3.6  | 0.09135 | 3.0 | 0.82 | 563.5 | 16.0 | 577.5 | 16.0 | 632.6  | 45.0  | 563.5  | 16.0 |
| JV61504-2-25    | 523  | 41932  | 1.1  | 0.13584 | 10.5 | 0.01917 | 2.1 | 0.20 | 122.4 | 2.6  | 129.3 | 12.7 | 258.4  | 236.7 | 122.4  | 2.6  |
| JV61504-2-26    | 499  | 206824 | 3.0  | 0.34458 | 9.1  | 0.04291 | 7.0 | 0.77 | 270.9 | 18.5 | 300.6 | 23.6 | 538.6  | 126.8 | 270.9  | 18.5 |
| JV61504-2-27    | 1186 | 102448 | 10.9 | 0.13309 | 6.3  | 0.01845 | 2.1 | 0.33 | 117.9 | 2.4  | 126.9 | 7.6  | 299.1  | 136.6 | 117.9  | 2.4  |
| JV61504-2-28    | 282  | 10198  | 1.3  | 0.17048 | 22.3 | 0.01843 | 3.5 | 0.16 | 117.7 | 4.1  | 159.8 | 33.0 | 840.7  | 463.6 | 117.7  | 4.1  |
| JV61504-2-30    | 271  | 10381  | 5.0  | 0.18712 | 12.2 | 0.02518 | 4.9 | 0.40 | 160.3 | 7.7  | 174.2 | 19.5 | 366.4  | 251.7 | 160.3  | 7.7  |
| <b>standard</b> | 153  | 38061  | 4.8  | 0.68459 | 9.7  | 0.08841 | 6.8 | 0.70 | 546.1 | 35.5 | 529.5 | 40.1 | 458.7  | 154.8 | 546.1  | 35.5 |
| JV61504-2-32    | 819  | 18120  | 12.9 | 0.13589 | 5.7  | 0.01927 | 2.3 | 0.40 | 123.0 | 2.8  | 129.4 | 6.9  | 248.0  | 120.9 | 123.0  | 2.8  |
| JV61504-2-33    | 679  | 10637  | 10.7 | 0.14771 | 10.9 | 0.02101 | 6.1 | 0.55 | 134.0 | 8.0  | 139.9 | 14.3 | 240.8  | 210.4 | 134.0  | 8.0  |
| <b>standard</b> | 304  | 40000  | 5.4  | 0.76137 | 4.6  | 0.09145 | 2.4 | 0.52 | 564.1 | 12.8 | 574.8 | 20.0 | 617.3  | 84.0  | 564.1  | 12.8 |

Sample JV61504-3

|                 |      |       |      |         |      |         |     |      |       |      |       |      |       |       |       |      |
|-----------------|------|-------|------|---------|------|---------|-----|------|-------|------|-------|------|-------|-------|-------|------|
| <b>standard</b> | 978  | 43322 | 5.2  | 0.73704 | 1.4  | 0.09156 | 1   | 0.71 | 564.7 | 5.4  | 560.7 | 6.1  | 544.2 | 22.0  | 564.7 | 5.4  |
| <b>standard</b> | 720  | 29402 | 4.6  | 0.70541 | 2.4  | 0.08871 | 1.6 | 0.68 | 547.9 | 8.6  | 542.0 | 10.1 | 517.3 | 38.3  | 547.9 | 8.6  |
| <b>standard</b> | 976  | 39750 | 5.2  | 0.74243 | 1.5  | 0.09149 | 1.1 | 0.75 | 564.4 | 6.1  | 563.8 | 6.5  | 561.6 | 21.8  | 564.4 | 6.1  |
| <b>standard</b> | 950  | 46552 | 5.0  | 0.72863 | 2.5  | 0.09082 | 1.7 | 0.70 | 560.4 | 9.3  | 555.7 | 10.6 | 536.7 | 38.8  | 560.4 | 9.3  |
| JV61504-3-01    | 1676 | 5234  | 3.8  | 0.14766 | 6.3  | 0.01964 | 3.1 | 0.49 | 125.4 | 3.8  | 139.8 | 8.3  | 392.5 | 124.0 | 125.4 | 3.8  |
| JV61504-3-02    | 867  | 9193  | 1.5  | 0.17976 | 6.2  | 0.02585 | 2.5 | 0.40 | 164.5 | 4.0  | 167.9 | 9.6  | 214.9 | 132.6 | 164.5 | 4.0  |
| JV61504-3-03    | 367  | 6778  | 3.0  | 0.29715 | 10.4 | 0.03832 | 6.5 | 0.62 | 242.4 | 15.4 | 264.2 | 24.2 | 461.9 | 181.1 | 242.4 | 15.4 |
| <b>standard</b> | 914  | 36500 | 5.0  | 0.71542 | 2.0  | 0.08900 | 1.2 | 0.57 | 549.6 | 6.1  | 548.0 | 8.6  | 541.0 | 36.8  | 549.6 | 6.1  |
| JV61504-3-05    | 300  | 12824 | 1.1  | 0.72903 | 5.1  | 0.08858 | 2.5 | 0.50 | 547.2 | 13.3 | 556.0 | 21.7 | 592.3 | 95.0  | 547.2 | 13.3 |
| <b>standard</b> | 394  | 48553 | 4.5  | 0.76895 | 3.6  | 0.09360 | 2.2 | 0.60 | 576.8 | 11.9 | 579.2 | 15.9 | 588.3 | 62.8  | 576.8 | 11.9 |
| <b>standard</b> | 455  | 39466 | 4.7  | 0.75783 | 2.2  | 0.09250 | 1.0 | 0.45 | 570.3 | 5.5  | 572.8 | 9.8  | 582.5 | 43.5  | 570.3 | 5.5  |
| JV61504-3-06    | 697  | 12261 | 12.4 | 0.14644 | 5.4  | 0.02118 | 1.4 | 0.27 | 135.1 | 1.9  | 138.8 | 7.0  | 201.6 | 121.1 | 135.1 | 1.9  |
| <b>standard</b> | 472  | 40417 | 4.7  | 0.76236 | 2.9  | 0.09348 | 1.0 | 0.35 | 576.1 | 5.7  | 575.4 | 12.9 | 572.5 | 59.9  | 576.1 | 5.7  |
| JV61504-3-10    | 701  | 17716 | 11.5 | 0.15701 | 9.0  | 0.02268 | 6.5 | 0.72 | 144.6 | 9.3  | 148.1 | 12.4 | 204.3 | 144.4 | 144.6 | 9.3  |
| JV61504-3-11    | 322  | 6235  | 5.5  | 0.18680 | 16.3 | 0.02246 | 2.4 | 0.15 | 143.2 | 3.4  | 173.9 | 26.1 | 615.1 | 350.8 | 143.2 | 3.4  |
| JV61504-3-12    | 638  | 8223  | 9.2  | 0.15482 | 9.9  | 0.02111 | 2.8 | 0.29 | 134.7 | 3.8  | 146.2 | 13.5 | 337.2 | 216.4 | 134.7 | 3.8  |
| JV61504-3-13    | 650  | 8933  | 7.3  | 0.14548 | 8.3  | 0.02005 | 3.1 | 0.38 | 128.0 | 4.0  | 137.9 | 10.7 | 312.8 | 175.6 | 128.0 | 4.0  |
| <b>standard</b> | 451  | 36386 | 4.7  | 0.75356 | 2.8  | 0.09061 | 2.0 | 0.71 | 559.1 | 10.8 | 570.3 | 12.3 | 615.0 | 42.6  | 559.1 | 10.8 |
| JV61504-3-15    | 837  | 14393 | 11.7 | 0.14197 | 6.2  | 0.02021 | 2.6 | 0.41 | 129.0 | 3.3  | 134.8 | 7.9  | 238.0 | 130.8 | 129.0 | 3.3  |
| JV61504-3-16    | 586  | 12338 | 10.5 | 0.16189 | 8.6  | 0.02159 | 1.7 | 0.20 | 137.7 | 2.3  | 152.4 | 12.2 | 386.9 | 189.5 | 137.7 | 2.3  |
| JV61504-3-17    | 606  | 12631 | 9.8  | 0.15773 | 10.3 | 0.02151 | 2.5 | 0.24 | 137.2 | 3.4  | 148.7 | 14.3 | 336.2 | 227.9 | 137.2 | 3.4  |
| <b>standard</b> | 388  | 37789 | 4.3  | 0.70491 | 3.7  | 0.08919 | 1.9 | 0.51 | 550.8 | 9.9  | 541.7 | 15.4 | 503.8 | 69.4  | 550.8 | 9.9  |
| JV61504-3-18    | 597  | 12187 | 11.8 | 0.15894 | 8.1  | 0.02205 | 4.0 | 0.50 | 140.6 | 5.6  | 149.8 | 11.3 | 297.4 | 161.0 | 140.6 | 5.6  |
| JV61504-3-19    | 655  | 11532 | 12.1 | 0.14217 | 10.0 | 0.02024 | 2.4 | 0.24 | 129.2 | 3.0  | 135.0 | 12.6 | 238.5 | 224.5 | 129.2 | 3.0  |
| JV61504-3-20    | 601  | 13521 | 10.4 | 0.15602 | 5.5  | 0.02183 | 2.7 | 0.49 | 139.2 | 3.7  | 147.2 | 7.6  | 277.7 | 110.2 | 139.2 | 3.7  |

|                 |     |       |      |         |      |         |      |      |       |       |       |       |       |       |       |       |
|-----------------|-----|-------|------|---------|------|---------|------|------|-------|-------|-------|-------|-------|-------|-------|-------|
| JV61504-3-21    | 817 | 11490 | 10.7 | 0.15235 | 8.3  | 0.02060 | 4.4  | 0.53 | 131.5 | 5.7   | 144.0 | 11.1  | 355.5 | 159.0 | 131.5 | 5.7   |
| <b>standard</b> | 437 | 51073 | 4.6  | 0.72608 | 3.1  | 0.09122 | 1.4  | 0.44 | 562.7 | 7.4   | 554.3 | 13.4  | 519.5 | 61.7  | 562.7 | 7.4   |
| JV61504-3-22    | 496 | 10756 | 9.5  | 0.15680 | 12.0 | 0.02155 | 3.5  | 0.29 | 137.4 | 4.8   | 147.9 | 16.5  | 319.4 | 261.9 | 137.4 | 4.8   |
| JV61504-3-23    | 532 | 10193 | 11.7 | 0.16618 | 9.1  | 0.02079 | 3.9  | 0.43 | 132.6 | 5.2   | 156.1 | 13.1  | 529.1 | 179.3 | 132.6 | 5.2   |
| JV61504-3-24    | 849 | 17307 | 14.4 | 0.13881 | 8.5  | 0.01909 | 2.4  | 0.29 | 121.9 | 2.9   | 132.0 | 10.5  | 317.7 | 184.6 | 121.9 | 2.9   |
| JV61504-3-25    | 568 | 13318 | 11.7 | 0.14589 | 13.9 | 0.02042 | 3.4  | 0.25 | 130.3 | 4.4   | 138.3 | 17.9  | 277.7 | 308.6 | 130.3 | 4.4   |
| JV61504-3-26    | 714 | 12241 | 8.8  | 0.15848 | 8.5  | 0.02090 | 3.3  | 0.38 | 133.4 | 4.3   | 149.4 | 11.8  | 411.6 | 176.4 | 133.4 | 4.3   |
| JV61504-3-27    | 878 | 14728 | 13.0 | 0.14737 | 6.0  | 0.02058 | 2.7  | 0.45 | 131.3 | 3.5   | 139.6 | 7.8   | 282.3 | 122.3 | 131.3 | 3.5   |
| JV61504-3-28    | 666 | 13800 | 10.0 | 0.14878 | 11.1 | 0.02097 | 4.1  | 0.37 | 133.8 | 5.5   | 140.8 | 14.6  | 261.2 | 237.0 | 133.8 | 5.5   |
| JV61504-3-29    | 843 | 15484 | 11.9 | 0.14874 | 7.3  | 0.02069 | 4.4  | 0.60 | 132.0 | 5.7   | 140.8 | 9.7   | 291.3 | 134.8 | 132.0 | 5.7   |
| <b>standard</b> | 326 | 29125 | 4.4  | 0.78781 | 23.4 | 0.09293 | 23.2 | 0.99 | 572.8 | 127.3 | 589.9 | 105.3 | 656.3 | 69.8  | 572.8 | 127.3 |

#### Sample JV61504-4

|                 |     |        |      |         |      |         |     |      |        |      |        |      |        |       |        |       |
|-----------------|-----|--------|------|---------|------|---------|-----|------|--------|------|--------|------|--------|-------|--------|-------|
| JV61504-4-01    | 410 | 28158  | 11.8 | 0.14840 | 33.4 | 0.02117 | 5.0 | 0.15 | 135.0  | 6.6  | 140.5  | 43.8 | 233.9  | 780.9 | 135.0  | 6.6   |
| JV61504-4-02    | 584 | 123833 | 14.1 | 0.15468 | 15.3 | 0.02056 | 4.4 | 0.29 | 131.2  | 5.7  | 146.0  | 20.8 | 394.3  | 329.7 | 131.2  | 5.7   |
| JV61504-4-03    | 604 | 78917  | 7.1  | 0.18567 | 16.0 | 0.02010 | 2.9 | 0.18 | 128.3  | 3.7  | 172.9  | 25.4 | 837.1  | 329.4 | 128.3  | 3.7   |
| <b>standard</b> | 286 | 165706 | 4.9  | 0.76382 | 9.3  | 0.09242 | 4.4 | 0.47 | 569.8  | 24.0 | 576.2  | 41.1 | 601.5  | 178.9 | 569.8  | 24.0  |
| JV61504-4-04    | 331 | 38394  | 1.0  | 0.19073 | 23.6 | 0.02023 | 4.5 | 0.19 | 129.1  | 5.7  | 177.3  | 38.4 | 880.1  | 485.0 | 129.1  | 5.7   |
| JV61504-4-05    | 441 | 27308  | 1.7  | 0.21040 | 23.1 | 0.02069 | 6.0 | 0.26 | 132.0  | 7.8  | 193.9  | 40.8 | 1034.2 | 457.1 | 132.0  | 7.8   |
| JV61504-4-06    | 692 | 45289  | 8.0  | 0.14789 | 18.4 | 0.02017 | 3.3 | 0.18 | 128.7  | 4.1  | 140.0  | 24.1 | 336.3  | 413.4 | 128.7  | 4.1   |
| <b>standard</b> | 341 | 245678 | 5.0  | 0.74551 | 6.6  | 0.09101 | 2.3 | 0.35 | 561.5  | 12.2 | 565.6  | 28.6 | 582.2  | 134.5 | 561.5  | 12.2  |
| JV61504-4-07    | 454 | 62747  | 3.9  | 0.17923 | 20.0 | 0.02147 | 4.4 | 0.22 | 136.9  | 6.0  | 167.4  | 30.8 | 623.4  | 423.6 | 136.9  | 6.0   |
| JV61504-4-08    | 523 | 43884  | 10.0 | 0.17310 | 16.6 | 0.02179 | 3.0 | 0.18 | 138.9  | 4.2  | 162.1  | 24.9 | 515.4  | 360.5 | 138.9  | 4.2   |
| JV61504-4-09    | 532 | 94751  | 10.2 | 0.15202 | 7.7  | 0.02087 | 3.8 | 0.49 | 133.1  | 5.0  | 143.7  | 10.3 | 321.9  | 151.9 | 133.1  | 5.0   |
| <b>standard</b> | 300 | 8102   | 5.0  | 0.70864 | 12.2 | 0.09255 | 7.8 | 0.64 | 570.6  | 42.5 | 543.9  | 51.4 | 433.8  | 209.0 | 570.6  | 42.5  |
| JV61504-4-10    | 350 | 68682  | 4.7  | 0.38789 | 12.4 | 0.03543 | 8.6 | 0.69 | 224.4  | 18.9 | 332.8  | 35.3 | 1182.3 | 178.0 | 224.4  | 18.9  |
| JV61504-4-11    | 674 | 12354  | 8.1  | 0.16014 | 12.5 | 0.02001 | 2.2 | 0.17 | 127.7  | 2.7  | 150.8  | 17.5 | 531.2  | 270.7 | 127.7  | 2.7   |
| JV61504-4-12    | 545 | 54054  | 8.6  | 0.16089 | 13.3 | 0.02057 | 3.6 | 0.27 | 131.2  | 4.7  | 151.5  | 18.7 | 481.1  | 283.0 | 131.2  | 4.7   |
| <b>standard</b> | 388 | 190056 | 4.7  | 0.73410 | 5.3  | 0.09028 | 2.5 | 0.48 | 557.2  | 13.5 | 559.0  | 22.8 | 566.1  | 101.3 | 557.2  | 13.5  |
| JV61504-4-13    | 764 | 17684  | 0.7  | 0.18990 | 11.3 | 0.01954 | 5.8 | 0.52 | 124.8  | 7.2  | 176.5  | 18.3 | 942.4  | 198.8 | 124.8  | 7.2   |
| JV61504-4-14    | 609 | 65762  | 5.5  | 0.15699 | 10.6 | 0.02014 | 3.0 | 0.28 | 128.6  | 3.8  | 148.1  | 14.6 | 473.2  | 225.1 | 128.6  | 3.8   |
| JV61504-4-15    | 278 | 4689   | 4.2  | 0.32002 | 11.6 | 0.03600 | 3.9 | 0.33 | 228.0  | 8.7  | 281.9  | 28.7 | 756.9  | 232.2 | 228.0  | 8.7   |
| <b>standard</b> | 398 | 95301  | 4.6  | 0.74234 | 5.2  | 0.09149 | 3.1 | 0.59 | 564.3  | 16.6 | 563.8  | 22.6 | 561.5  | 92.2  | 564.3  | 16.6  |
| JV61504-4-16    | 352 | 13573  | 6.7  | 0.18903 | 18.5 | 0.02098 | 5.7 | 0.31 | 133.9  | 7.6  | 175.8  | 29.8 | 785.1  | 371.2 | 133.9  | 7.6   |
| JV61504-4-17    | 324 | 26934  | 5.9  | 0.23227 | 25.2 | 0.02328 | 4.3 | 0.17 | 148.3  | 6.3  | 212.1  | 48.3 | 996.5  | 512.2 | 148.3  | 6.3   |
| JV61504-4-18    | 385 | 2501   | 1.0  | 0.24800 | 12.5 | 0.02099 | 6.2 | 0.50 | 133.9  | 8.2  | 225.0  | 25.3 | 1331.4 | 210.8 | 133.9  | 8.2   |
| <b>standard</b> | 404 | 93956  | 5.0  | 0.77986 | 4.1  | 0.09089 | 1.7 | 0.41 | 560.8  | 9.0  | 585.4  | 18.1 | 682.0  | 79.1  | 560.8  | 9.0   |
| JV61504-4-19    | 398 | 22666  | 5.4  | 0.19517 | 22.6 | 0.02895 | 3.2 | 0.14 | 184.0  | 5.7  | 181.0  | 37.5 | 142.7  | 531.7 | 184.0  | 5.7   |
| JV61504-4-20    | 274 | 6139   | 1.7  | 0.26299 | 18.8 | 0.02235 | 6.8 | 0.36 | 142.5  | 9.6  | 237.1  | 39.8 | 1323.2 | 342.8 | 142.5  | 9.6   |
| JV61504-4-21    | 454 | 14475  | 4.0  | 0.18141 | 13.7 | 0.02110 | 6.2 | 0.45 | 134.6  | 8.2  | 169.3  | 21.3 | 686.8  | 260.6 | 134.6  | 8.2   |
| <b>standard</b> | 378 | 18404  | 4.8  | 0.67413 | 3.8  | 0.08974 | 1.3 | 0.35 | 554.0  | 7.2  | 523.2  | 15.7 | 391.1  | 80.7  | 554.0  | 7.2   |
| JV61504-4-22    | 55  | 5279   | 2.8  | 1.59688 | 13.7 | 0.12006 | 6.9 | 0.50 | 730.9  | 47.8 | 969.0  | 86.0 | 1556.9 | 223.8 | 1556.9 | 223.8 |
| JV61504-4-23    | 405 | 15626  | 4.0  | 0.13076 | 23.9 | 0.02045 | 4.0 | 0.17 | 130.5  | 5.2  | 124.8  | 28.0 | 17.7   | 572.2 | 130.5  | 5.2   |
| JV61504-4-24    | 140 | 41583  | 2.0  | 2.12309 | 6.1  | 0.17422 | 4.7 | 0.76 | 1035.3 | 44.5 | 1156.3 | 42.2 | 1390.8 | 75.9  | 1390.8 | 75.9  |
| <b>standard</b> | 285 | 34700  | 5.3  | 0.79375 | 6.4  | 0.09357 | 2.4 | 0.38 | 576.6  | 13.4 | 593.3  | 28.5 | 657.5  | 125.9 | 576.6  | 13.4  |
| <b>standard</b> | 279 | 23922  | 5.3  | 0.79572 | 7.7  | 0.09327 | 3.6 | 0.47 | 574.9  | 19.8 | 594.4  | 34.5 | 669.7  | 145.0 | 574.9  | 19.8  |
| JV61504-4-25    | 430 | 20667  | 4.0  | 0.14317 | 11.7 | 0.02099 | 2.6 | 0.22 | 133.9  | 3.4  | 135.9  | 14.8 | 170.1  | 266.6 | 133.9  | 3.4   |
| JV61504-4-26    | 631 | 10738  | 3.0  | 0.16986 | 16.3 | 0.02035 | 2.9 | 0.18 | 129.9  | 3.7  | 159.3  | 24.1 | 622.7  | 348.8 | 129.9  | 3.7   |
| JV61504-4-27    | 398 | 34840  | 8.2  | 0.17115 | 15.4 | 0.02154 | 3.4 | 0.22 | 137.4  | 4.6  | 160.4  | 22.8 | 515.6  | 331.0 | 137.4  | 4.6   |
| <b>standard</b> | 388 | 78682  | 5.0  | 0.66350 | 5.7  | 0.09090 | 2.1 | 0.36 | 560.8  | 11.2 | 516.8  | 23.3 | 326.2  | 121.6 | 560.8  | 11.2  |
| JV61504-4-28    | 568 | 10392  | 9.7  | 0.15234 | 15.8 | 0.02036 | 4.1 | 0.26 | 129.9  | 5.3  | 144.0  | 21.2 | 382.3  | 344.0 | 129.9  | 5.3   |
| JV61504-4-29    | 297 | 17941  | 3.5  | 0.12993 | 31.4 | 0.02198 | 4.5 | 0.14 | 140.2  | 6.3  | 124.0  | 36.6 | -174.9 | 790.2 | 140.2  | 6.3   |
| JV61504-4-30    | 750 | 921    | 9.9  | 0.10222 | 31.7 | 0.01904 | 3.5 | 0.11 | 121.6  | 4.2  | 98.8   | 29.9 | -421.7 | 843.3 | 121.6  | 4.2   |
| <b>standard</b> | 392 | 46327  | 4.9  | 0.74987 | 4.1  | 0.09050 | 1.4 | 0.33 | 558.5  | 7.3  | 568.1  | 17.9 | 606.9  | 84.1  | 558.5  | 7.3   |

#### Sample JV62204-1

|                 |     |        |      |         |      |         |     |      |       |      |        |      |        |       |        |      |
|-----------------|-----|--------|------|---------|------|---------|-----|------|-------|------|--------|------|--------|-------|--------|------|
| JV62204-1-01    | 258 | 31892  | 12.7 | 0.17029 | 18.8 | 0.02239 | 2.7 | 0.14 | 142.7 | 3.8  | 159.7  | 27.8 | 419.0  | 418.6 | 142.7  | 3.8  |
| JV62204-1-02    | 222 | 35015  | 4.3  | 0.50668 | 6.4  | 0.06495 | 2.6 | 0.40 | 405.6 | 10.1 | 416.2  | 21.9 | 475.2  | 130.1 | 405.6  | 10.1 |
| JV62204-1-03    | 187 | 23943  | 7.3  | 1.39949 | 6.7  | 0.06715 | 5.3 | 0.79 | 419.0 | 21.5 | 888.7  | 39.7 | 2359.1 | 69.8  | 2359.1 | 69.8 |
| <b>standard</b> | 416 | 76686  | 4.5  | 0.74589 | 3.1  | 0.09170 | 1.7 | 0.53 | 565.6 | 9.0  | 565.8  | 13.5 | 566.9  | 57.2  | 565.6  | 9.0  |
| JV62204-1-04    | 316 | 23386  | 6.2  | 0.18882 | 9.8  | 0.02159 | 4.2 | 0.43 | 137.7 | 5.7  | 175.6  | 15.9 | 723.0  | 189.0 | 137.7  | 5.7  |
| JV62204-1-05    | 389 | 235427 | 3.7  | 1.69734 | 3.2  | 0.16424 | 2.8 | 0.86 | 980.3 | 25.4 | 1007.5 | 20.6 | 1067.2 | 32.8  | 1067.2 | 32.8 |

|                 |     |        |      |         |       |         |     |      |        |      |        |       |         |        |        |      |
|-----------------|-----|--------|------|---------|-------|---------|-----|------|--------|------|--------|-------|---------|--------|--------|------|
| JV62204-1-06    | 295 | 33447  | 1.7  | 0.17084 | 19.2  | 0.02137 | 2.7 | 0.14 | 136.3  | 3.6  | 160.1  | 28.5  | 529.1   | 420.5  | 136.3  | 3.6  |
| <b>standard</b> | 468 | 156182 | 4.3  | 0.74249 | 4.1   | 0.09051 | 2.5 | 0.62 | 558.6  | 13.6 | 563.9  | 17.6  | 585.2   | 69.3   | 558.6  | 13.6 |
| JV62204-1-07    | 217 | 54230  | 3.0  | 0.19393 | 24.5  | 0.02049 | 4.4 | 0.18 | 130.7  | 5.6  | 180.0  | 40.4  | 888.3   | 504.3  | 130.7  | 5.6  |
| JV62204-1-08    | 75  | 84239  | 1.0  | 1.74191 | 8.3   | 0.16103 | 6.9 | 0.82 | 962.5  | 61.4 | 1024.2 | 53.9  | 1158.4  | 94.3   | 1158.4 | 94.3 |
| JV62204-1-09    | 338 | 50167  | 4.4  | 0.18143 | 13.2  | 0.02206 | 3.1 | 0.23 | 140.7  | 4.3  | 169.3  | 20.7  | 590.4   | 280.4  | 140.7  | 4.3  |
| <b>standard</b> | 435 | 19068  | 4.6  | 0.74602 | 3.3   | 0.09255 | 1.3 | 0.38 | 570.6  | 6.9  | 565.9  | 14.5  | 547.2   | 67.3   | 570.6  | 6.9  |
| JV62204-1-10    | 263 | 42840  | 7.8  | 0.14370 | 23.6  | 0.02027 | 4.6 | 0.20 | 129.3  | 5.9  | 136.3  | 30.1  | 259.9   | 538.4  | 129.3  | 5.9  |
| JV62204-1-11    | 350 | 51474  | 9.8  | 0.14557 | 15.8  | 0.02080 | 3.4 | 0.22 | 132.7  | 4.5  | 138.0  | 20.3  | 229.4   | 356.9  | 132.7  | 4.5  |
| JV62204-1-12    | 59  | 7827   | 2.2  | 0.57258 | 142.9 | 0.03478 | 6.4 | 0.05 | 220.4  | 14.0 | 459.7  | 585.4 | 1947.0  | 78.4   | 1947.0 | 78.4 |
| <b>standard</b> | 424 | 147070 | 5.2  | 0.73853 | 4.2   | 0.09109 | 2.1 | 0.51 | 562.0  | 11.6 | 561.5  | 18.0  | 559.8   | 78.1   | 562.0  | 11.6 |
| JV62204-1-13    | 386 | 103989 | 6.9  | 0.19390 | 10.8  | 0.02437 | 3.5 | 0.32 | 155.2  | 5.3  | 179.9  | 17.9  | 518.9   | 225.7  | 155.2  | 5.3  |
| JV62204-1-14    | 402 | 43392  | 3.4  | 0.18310 | 10.1  | 0.02227 | 2.5 | 0.24 | 142.0  | 3.5  | 170.7  | 15.9  | 590.1   | 213.9  | 142.0  | 3.5  |
| JV62204-1-15    | 274 | 254642 | 3.6  | 3.79702 | 4.3   | 0.25536 | 4.1 | 0.97 | 1466.1 | 54.2 | 1592.1 | 34.2  | 1763.2  | 18.3   | 1763.2 | 18.3 |
| JV62204-1-16    | 243 | 39045  | 1.2  | 0.37079 | 10.4  | 0.04978 | 3.4 | 0.33 | 313.2  | 10.5 | 320.2  | 28.6  | 372.1   | 221.6  | 313.2  | 10.5 |
| JV62204-1-17    | 249 | 43608  | 7.4  | 0.17806 | 17.9  | 0.02315 | 5.3 | 0.30 | 147.5  | 7.8  | 166.4  | 27.5  | 443.5   | 383.5  | 147.5  | 7.8  |
| JV62204-1-18    | 213 | 8372   | 1.0  | 0.15506 | 22.8  | 0.02443 | 4.1 | 0.18 | 155.6  | 6.3  | 146.4  | 31.1  | -1.1    | 546.1  | 155.6  | 6.3  |
| <b>standard</b> | 406 | 18425  | 4.8  | 0.74106 | 3.9   | 0.09130 | 2.3 | 0.58 | 563.2  | 12.3 | 563.0  | 17.1  | 562.1   | 70.4   | 563.2  | 12.3 |
| JV62204-1-19    | 237 | 33614  | 3.7  | 0.16548 | 28.0  | 0.02255 | 3.1 | 0.11 | 143.8  | 4.4  | 155.5  | 40.4  | 337.8   | 641.1  | 143.8  | 4.4  |
| JV62204-1-22    | 608 | 52818  | 10.4 | 0.20097 | 11.2  | 0.02573 | 9.5 | 0.84 | 163.8  | 15.3 | 185.9  | 19.1  | 477.5   | 133.2  | 163.8  | 15.3 |
| JV62204-1-24    | 342 | 127910 | 7.8  | 1.45308 | 6.2   | 0.12438 | 6.0 | 0.97 | 755.8  | 42.7 | 911.1  | 37.3  | 1309.3  | 30.9   | 1309.3 | 30.9 |
| <b>standard</b> | 419 | 15812  | 4.7  | 0.73885 | 4.4   | 0.09065 | 1.7 | 0.38 | 559.4  | 9.1  | 561.7  | 19.0  | 571.3   | 88.3   | 559.4  | 9.1  |
| <b>standard</b> | 469 | 104448 | 4.7  | 0.74758 | 3.1   | 0.09091 | 1.0 | 0.32 | 560.9  | 5.4  | 566.8  | 13.5  | 590.5   | 63.9   | 560.9  | 5.4  |
| JV62204-1-25    | 472 | 25238  | 2.5  | 0.33508 | 5.6   | 0.04470 | 3.6 | 0.65 | 281.9  | 10.1 | 293.4  | 14.2  | 386.1   | 95.0   | 281.9  | 10.1 |
| JV62204-1-26    | 459 | 7924   | 9.0  | 0.16944 | 11.4  | 0.02120 | 7.4 | 0.65 | 135.3  | 10.0 | 158.9  | 16.8  | 528.1   | 189.2  | 135.3  | 10.0 |
| JV62204-1-27    | 554 | 31952  | 12.6 | 0.16607 | 10.5  | 0.02068 | 3.0 | 0.28 | 132.0  | 3.9  | 156.0  | 15.2  | 538.8   | 220.7  | 132.0  | 3.9  |
| <b>standard</b> | 213 | 161699 | 4.6  | 0.74041 | 6.5   | 0.09279 | 3.9 | 0.60 | 572.0  | 21.3 | 562.6  | 28.0  | 524.9   | 113.7  | 572.0  | 21.3 |
| JV62204-1-28    | 471 | 12475  | 6.6  | 0.16482 | 11.8  | 0.02056 | 2.7 | 0.23 | 131.2  | 3.5  | 154.9  | 16.9  | 534.8   | 251.2  | 131.2  | 3.5  |
| JV62204-1-29    | 827 | 2106   | 11.2 | 0.12381 | 14.8  | 0.01892 | 3.3 | 0.22 | 120.8  | 3.9  | 118.5  | 16.6  | 72.3    | 345.4  | 120.8  | 3.9  |
| JV62204-1-30    | 501 | 4476   | 5.4  | 0.13318 | 13.2  | 0.02179 | 3.4 | 0.26 | 138.9  | 4.7  | 126.9  | 15.8  | -92.2   | 314.3  | 138.9  | 4.7  |
| <b>standard</b> | 359 | 45532  | 5.1  | 0.76060 | 3.2   | 0.09163 | 1.6 | 0.51 | 565.2  | 8.9  | 574.4  | 14.0  | 610.8   | 59.1   | 565.2  | 8.9  |
| JV62204-1-31    | 553 | 30323  | 6.3  | 0.15390 | 10.4  | 0.02005 | 4.4 | 0.42 | 128.0  | 5.6  | 145.3  | 14.2  | 438.6   | 211.2  | 128.0  | 5.6  |
| JV62204-1-32    | 302 | 1433   | 8.1  | 0.11986 | 24.9  | 0.02100 | 4.2 | 0.17 | 134.0  | 5.6  | 114.9  | 27.1  | -263.4  | 630.6  | 134.0  | 5.6  |
| JV62204-1-33    | 290 | 449    | 7.1  | 0.08488 | 53.6  | 0.02044 | 5.5 | 0.10 | 130.4  | 7.1  | 82.7   | 42.6  | -1147.0 | 1735.3 | 130.4  | 7.1  |
| <b>standard</b> | 457 | 145267 | 4.6  | 0.73885 | 3.4   | 0.09129 | 2.2 | 0.64 | 563.2  | 11.8 | 561.7  | 14.9  | 555.8   | 58.1   | 563.2  | 11.8 |
| JV62204-1-34    | 345 | 12233  | 1.4  | 0.17879 | 14.8  | 0.02041 | 2.9 | 0.19 | 130.2  | 3.7  | 167.0  | 22.7  | 726.4   | 308.7  | 130.2  | 3.7  |
| JV62204-1-35    | 324 | 8380   | 6.0  | 0.68122 | 10.8  | 0.05280 | 6.7 | 0.62 | 331.7  | 21.7 | 527.5  | 44.3  | 1499.3  | 159.5  | 331.7  | 21.7 |
| JV62204-1-36    | 526 | 8013   | 8.6  | 0.16510 | 8.8   | 0.02157 | 3.8 | 0.44 | 137.6  | 5.2  | 155.2  | 12.7  | 433.1   | 176.4  | 137.6  | 5.2  |
| <b>standard</b> | 314 | 79559  | 4.3  | 0.75553 | 4.8   | 0.09309 | 3.3 | 0.67 | 573.8  | 17.9 | 571.4  | 21.1  | 562.2   | 77.6   | 573.8  | 17.9 |
| <b>standard</b> | 333 | 2149   | 4.5  | 0.71911 | 10.5  | 0.09077 | 1.7 | 0.17 | 560.1  | 9.3  | 550.1  | 44.7  | 509.2   | 228.4  | 560.1  | 9.3  |

Sample JV62204-2

|                 |      |       |     |         |      |         |     |      |       |      |       |      |        |       |       |      |
|-----------------|------|-------|-----|---------|------|---------|-----|------|-------|------|-------|------|--------|-------|-------|------|
| JV62204-2-01    | 346  | 8816  | 2.1 | 0.16976 | 18.1 | 0.02233 | 6.2 | 0.34 | 142.4 | 8.8  | 159.2 | 26.6 | 417.4  | 381.1 | 142.4 | 8.8  |
| JV62204-2-03    | 910  | 15764 | 2.9 | 0.15155 | 9.3  | 0.02227 | 5.7 | 0.61 | 142.0 | 8.0  | 143.3 | 12.5 | 164.6  | 172.8 | 142.0 | 8.0  |
| JV62204-2-04    | 696  | 13877 | 1.3 | 0.15782 | 8.2  | 0.02121 | 3.5 | 0.42 | 135.3 | 4.6  | 148.8 | 11.4 | 369.2  | 168.2 | 135.3 | 4.6  |
| <b>standard</b> | 341  | 33479 | 4.6 | 0.78576 | 8.8  | 0.09409 | 3.6 | 0.40 | 579.7 | 19.7 | 588.8 | 39.4 | 623.9  | 174.3 | 579.7 | 19.7 |
| JV62204-2-05    | 645  | 6842  | 3.6 | 0.16964 | 12.5 | 0.02104 | 2.5 | 0.20 | 134.2 | 3.3  | 159.1 | 18.4 | 547.7  | 268.5 | 134.2 | 3.3  |
| JV62204-2-06    | 791  | 16430 | 5.2 | 0.15189 | 5.1  | 0.02145 | 2.3 | 0.45 | 136.8 | 3.1  | 143.6 | 6.9  | 256.7  | 105.3 | 136.8 | 3.1  |
| JV62204-2-07    | 534  | 7935  | 2.3 | 0.16394 | 6.7  | 0.02273 | 3.5 | 0.53 | 144.9 | 5.1  | 154.1 | 9.6  | 298.7  | 129.6 | 144.9 | 5.1  |
| JV62204-2-08    | 645  | 12565 | 7.6 | 0.14853 | 6.9  | 0.02050 | 3.5 | 0.50 | 130.8 | 4.5  | 140.6 | 9.0  | 309.9  | 135.1 | 130.8 | 4.5  |
| <b>standard</b> | 317  | 37838 | 4.3 | 0.71484 | 5.6  | 0.08824 | 3.4 | 0.61 | 545.1 | 17.9 | 547.6 | 23.7 | 558.0  | 96.7  | 545.1 | 17.9 |
| <b>standard</b> | 415  | 38185 | 4.3 | 0.73642 | 4.2  | 0.09166 | 1.3 | 0.31 | 565.4 | 7.1  | 560.3 | 18.0 | 539.8  | 86.9  | 565.4 | 7.1  |
| JV62204-2-09    | 324  | 5327  | 2.9 | 0.19454 | 9.9  | 0.02213 | 1.8 | 0.19 | 141.1 | 2.6  | 180.5 | 16.4 | 733.8  | 207.1 | 141.1 | 2.6  |
| JV62204-2-10    | 230  | 4183  | 3.0 | 0.18356 | 12.6 | 0.02152 | 2.7 | 0.21 | 137.2 | 3.6  | 171.1 | 19.8 | 669.8  | 264.5 | 137.2 | 3.6  |
| JV62204-2-11    | 1405 | 964   | 3.4 | 0.24836 | 18.5 | 0.02271 | 8.2 | 0.44 | 144.8 | 11.7 | 225.2 | 37.3 | 1180.1 | 329.4 | 144.8 | 11.7 |
| JV62204-2-12    | 828  | 19045 | 3.4 | 0.15740 | 8.2  | 0.02445 | 4.2 | 0.51 | 155.7 | 6.4  | 148.4 | 11.3 | 33.4   | 169.5 | 155.7 | 6.4  |
| <b>standard</b> | 461  | 45144 | 4.8 | 0.75125 | 2.0  | 0.09265 | 1.4 | 0.72 | 571.2 | 7.8  | 568.9 | 8.5  | 560.0  | 29.5  | 571.2 | 7.8  |
| JV62204-2-13    | 353  | 5544  | 2.7 | 0.18997 | 15.1 | 0.02397 | 6.6 | 0.44 | 152.7 | 9.9  | 176.6 | 24.5 | 510.4  | 299.5 | 152.7 | 9.9  |
| JV62204-2-14    | 399  | 6196  | 2.9 | 0.17134 | 9.9  | 0.02227 | 3.7 | 0.38 | 142.0 | 5.2  | 160.6 | 14.7 | 444.6  | 204.8 | 142.0 | 5.2  |
| JV62204-2-16    | 780  | 4880  | 3.5 | 0.16460 | 13.1 | 0.02064 | 4.9 | 0.37 | 131.7 | 6.3  | 154.7 | 18.8 | 523.2  | 266.9 | 131.7 | 6.3  |
| <b>standard</b> | 489  | 40131 | 4.9 | 0.74591 | 1.8  | 0.09181 | 1.3 | 0.75 | 566.3 | 7.2  | 565.8 | 7.8  | 564.2  | 25.9  | 566.3 | 7.2  |
| JV62204-2-17    | 477  | 5934  | 2.9 | 0.16692 | 11.0 | 0.02225 | 4.1 | 0.37 | 141.9 | 5.8  | 156.7 | 15.9 | 387.7  | 229.0 | 141.9 | 5.8  |
| JV62204-2-18    | 563  | 803   | 3.5 | 0.29335 | 22.6 | 0.02513 | 8.7 | 0.39 | 160.0 | 13.8 | 261.2 | 52.0 | 1308.2 | 408.6 | 160.0 | 13.8 |

|                 |     |       |     |         |      |         |     |      |       |      |       |      |        |       |       |      |
|-----------------|-----|-------|-----|---------|------|---------|-----|------|-------|------|-------|------|--------|-------|-------|------|
| JV62204-2-19    | 450 | 7163  | 2.7 | 0.17405 | 14.5 | 0.02290 | 9.7 | 0.67 | 146.0 | 14.0 | 162.9 | 21.8 | 417.2  | 241.3 | 146.0 | 14.0 |
| <b>standard</b> | 464 | 70984 | 4.7 | 0.73500 | 2.6  | 0.09083 | 1.4 | 0.55 | 560.5 | 7.7  | 559.5 | 11.3 | 555.5  | 47.8  | 560.5 | 7.7  |
| <b>standard</b> | 466 | 37474 | 4.8 | 0.73042 | 2.8  | 0.09254 | 1.0 | 0.35 | 570.5 | 5.5  | 556.8 | 12.2 | 501.1  | 58.4  | 570.5 | 5.5  |
| JV62204-2-25    | 489 | 4294  | 2.2 | 0.16753 | 16.8 | 0.02156 | 2.9 | 0.17 | 137.5 | 3.9  | 157.3 | 24.4 | 466.5  | 368.4 | 137.5 | 3.9  |
| JV62204-2-26    | 243 | 3708  | 2.3 | 0.18815 | 23.0 | 0.02221 | 3.9 | 0.17 | 141.6 | 5.5  | 175.0 | 37.0 | 654.9  | 491.6 | 141.6 | 5.5  |
| JV62204-2-27    | 752 | 2139  | 4.9 | 0.22163 | 22.8 | 0.02350 | 4.6 | 0.20 | 149.7 | 6.9  | 203.3 | 42.0 | 880.7  | 466.7 | 149.7 | 6.9  |
| JV62204-2-28    | 497 | 10264 | 2.9 | 0.17228 | 12.0 | 0.02168 | 4.1 | 0.34 | 138.3 | 5.6  | 161.4 | 18.0 | 516.1  | 249.4 | 138.3 | 5.6  |
| <b>standard</b> | 342 | 43431 | 4.5 | 0.74946 | 6.8  | 0.09035 | 2.9 | 0.43 | 557.6 | 15.5 | 567.9 | 29.6 | 609.3  | 133.1 | 557.6 | 15.5 |
| JV62204-2-30    | 877 | 1206  | 3.7 | 0.22958 | 8.0  | 0.02243 | 4.6 | 0.58 | 143.0 | 6.5  | 209.8 | 15.1 | 1047.8 | 131.3 | 143.0 | 6.5  |
| JV62204-2-31    | 761 | 2935  | 2.6 | 0.18481 | 11.0 | 0.02133 | 3.5 | 0.32 | 136.1 | 4.7  | 172.2 | 17.4 | 702.8  | 221.7 | 136.1 | 4.7  |
| JV62204-2-32    | 480 | 10001 | 3.7 | 0.15974 | 9.8  | 0.02286 | 3.3 | 0.34 | 145.7 | 4.8  | 150.5 | 13.7 | 226.6  | 213.2 | 145.7 | 4.8  |
| <b>standard</b> | 370 | 28618 | 4.3 | 0.75578 | 4.6  | 0.09146 | 3.6 | 0.79 | 564.2 | 19.6 | 571.6 | 20.0 | 601.0  | 60.0  | 564.2 | 19.6 |
| <b>standard</b> | 456 | 38503 | 4.7 | 0.73141 | 2.9  | 0.09130 | 2.7 | 0.93 | 563.2 | 14.7 | 557.4 | 12.6 | 533.6  | 24.4  | 563.2 | 14.7 |

Sample JV61204-1

|                 |      |       |     |        |       |        |     |      |       |      |       |       |        |        |       |      |
|-----------------|------|-------|-----|--------|-------|--------|-----|------|-------|------|-------|-------|--------|--------|-------|------|
| <b>standard</b> | 511  | 29384 | 4.8 | 0.7412 | 2.6   | 0.0922 | 1.6 | 0.63 | 568.5 | 8.9  | 563.1 | 11.2  | 541.2  | 44.2   | 568.5 | 8.9  |
| <b>standard</b> | 515  | 26228 | 4.1 | 0.7548 | 2.3   | 0.0918 | 1.4 | 0.63 | 566.3 | 7.8  | 571.0 | 10.0  | 590.0  | 38.7   | 566.3 | 7.8  |
| <b>standard</b> | 564  | 33378 | 3.8 | 0.7493 | 2.9   | 0.0922 | 1.5 | 0.52 | 568.4 | 8.2  | 567.8 | 12.5  | 565.5  | 53.2   | 568.4 | 8.2  |
| <b>standard</b> | 475  | 34694 | 5.2 | 0.7529 | 2.7   | 0.0919 | 2.0 | 0.76 | 566.5 | 11.0 | 569.9 | 11.7  | 583.5  | 38.0   | 566.5 | 11.0 |
| <b>standard</b> | 478  | 29166 | 4.8 | 0.7181 | 3.2   | 0.0891 | 1.4 | 0.44 | 550.1 | 7.4  | 549.6 | 13.5  | 547.3  | 62.3   | 550.1 | 7.4  |
| JV61204-1-01C   | 248  | 2166  | 1.2 | 0.0804 | 16.6  | 0.0125 | 2.2 | 0.13 | 79.9  | 1.7  | 78.5  | 12.6  | 35.2   | 397.4  | 79.9  | 1.7  |
| JV61204-1-01R   | 422  | 4012  | 2.2 | 0.0872 | 8.9   | 0.0119 | 2.2 | 0.25 | 76.3  | 1.7  | 84.9  | 7.3   | 332.9  | 195.9  | 76.3  | 1.7  |
| JV61204-1-02C   | 344  | 2476  | 1.4 | 0.0890 | 16.3  | 0.0125 | 1.6 | 0.10 | 80.3  | 1.3  | 86.6  | 13.5  | 263.3  | 374.0  | 80.3  | 1.3  |
| JV61204-1-03    | 164  | 1536  | 2.1 | 0.0762 | 194.8 | 0.0132 | 2.2 | 0.01 | 84.6  | 1.8  | 74.6  | 140.9 | -235.8 | 2266.5 | 84.6  | 1.8  |
| JV61204-1-04    | 530  | 3844  | 1.7 | 0.0742 | 12.6  | 0.0123 | 1.6 | 0.13 | 78.9  | 1.3  | 72.7  | 8.8   | -127.0 | 308.6  | 78.9  | 1.3  |
| <b>standard</b> | 595  | 31250 | 4.9 | 0.7481 | 2.5   | 0.0917 | 1.7 | 0.68 | 565.4 | 9.4  | 567.1 | 11.0  | 573.8  | 40.3   | 565.4 | 9.4  |
| JV61204-1-05    | 483  | 3854  | 2.4 | 0.0799 | 8.0   | 0.0120 | 1.1 | 0.14 | 77.2  | 0.8  | 78.0  | 6.0   | 105.1  | 188.5  | 77.2  | 0.8  |
| JV61204-1-06    | 1491 | 9424  | 1.9 | 0.0842 | 3.2   | 0.0125 | 1.7 | 0.52 | 80.3  | 1.3  | 82.1  | 2.5   | 136.2  | 63.6   | 80.3  | 1.3  |
| JV61204-1-07    | 342  | 2122  | 1.1 | 0.0804 | 15.4  | 0.0130 | 0.8 | 0.05 | 83.2  | 0.7  | 78.6  | 11.6  | -60.0  | 376.2  | 83.2  | 0.7  |
| JV61204-1-08    | 551  | 3524  | 1.0 | 0.0842 | 8.0   | 0.0130 | 1.5 | 0.19 | 83.3  | 1.3  | 82.1  | 6.3   | 46.6   | 188.5  | 83.3  | 1.3  |
| JV61204-1-09    | 597  | 4574  | 1.9 | 0.0905 | 7.2   | 0.0127 | 2.1 | 0.29 | 81.3  | 1.7  | 88.0  | 6.1   | 274.3  | 158.0  | 81.3  | 1.7  |
| <b>standard</b> | 554  | 34510 | 3.9 | 0.7356 | 4.4   | 0.0914 | 2.5 | 0.56 | 564.0 | 13.3 | 559.8 | 18.8  | 542.9  | 79.0   | 564.0 | 13.3 |
| JV61204-1-10    | 518  | 3342  | 0.9 | 0.0760 | 13.5  | 0.0123 | 4.8 | 0.35 | 78.9  | 3.7  | 74.3  | 9.7   | -71.3  | 309.1  | 78.9  | 3.7  |
| JV61204-1-11    | 708  | 3586  | 0.7 | 0.0945 | 5.2   | 0.0130 | 1.8 | 0.35 | 83.2  | 1.5  | 91.7  | 4.5   | 317.9  | 110.4  | 83.2  | 1.5  |
| JV61204-1-12    | 280  | 2204  | 0.9 | 0.0823 | 15.3  | 0.0122 | 6.6 | 0.43 | 78.3  | 5.2  | 80.3  | 11.8  | 140.6  | 325.8  | 78.3  | 5.2  |
| JV61204-1-13    | 274  | 1670  | 1.0 | 0.0783 | 14.0  | 0.0118 | 4.3 | 0.31 | 75.5  | 3.3  | 76.6  | 10.3  | 110.6  | 316.2  | 75.5  | 3.3  |
| JV61204-1-14    | 384  | 2798  | 1.7 | 0.0927 | 7.9   | 0.0125 | 2.5 | 0.32 | 79.9  | 2.0  | 90.0  | 6.8   | 366.2  | 168.0  | 79.9  | 2.0  |
| <b>standard</b> | 461  | 24128 | 5.5 | 0.7468 | 2.6   | 0.0925 | 1.4 | 0.53 | 570.4 | 7.4  | 566.3 | 11.1  | 550.0  | 47.3   | 570.4 | 7.4  |
| JV61204-1-15    | 476  | 3020  | 1.7 | 0.0952 | 9.3   | 0.0131 | 1.0 | 0.11 | 84.1  | 0.9  | 92.3  | 8.2   | 309.8  | 211.2  | 84.1  | 0.9  |
| JV61204-1-16    | 430  | 2384  | 1.7 | 0.0795 | 15.1  | 0.0124 | 1.7 | 0.11 | 79.5  | 1.3  | 77.6  | 11.3  | 19.9   | 362.0  | 79.5  | 1.3  |
| JV61204-1-17    | 407  | 2228  | 1.1 | 0.0852 | 19.9  | 0.0125 | 5.5 | 0.27 | 80.2  | 4.4  | 83.1  | 15.9  | 165.4  | 450.1  | 80.2  | 4.4  |
| JV61204-1-18    | 204  | 1394  | 1.2 | 0.0789 | 21.4  | 0.0126 | 2.5 | 0.12 | 80.9  | 2.0  | 77.1  | 15.9  | -37.4  | 521.8  | 80.9  | 2.0  |
| JV61204-1-19    | 297  | 2592  | 1.8 | 0.0976 | 11.9  | 0.0123 | 4.6 | 0.39 | 78.8  | 3.6  | 94.6  | 10.7  | 513.1  | 241.1  | 78.8  | 3.6  |
| <b>standard</b> | 482  | 27314 | 4.7 | 0.7472 | 4.1   | 0.0904 | 1.2 | 0.29 | 558.0 | 6.4  | 566.6 | 17.9  | 601.2  | 85.4   | 558.0 | 6.4  |
| JV61204-1-20    | 596  | 4298  | 2.3 | 0.0810 | 9.0   | 0.0125 | 1.5 | 0.16 | 80.3  | 1.2  | 79.1  | 6.8   | 41.5   | 212.3  | 80.3  | 1.2  |
| JV61204-1-21    | 416  | 3702  | 1.8 | 0.0790 | 16.5  | 0.0124 | 2.8 | 0.17 | 79.4  | 2.2  | 77.2  | 12.2  | 10.6   | 392.7  | 79.4  | 2.2  |
| JV61204-1-22    | 632  | 3608  | 1.9 | 0.0905 | 6.9   | 0.0132 | 0.9 | 0.14 | 84.5  | 0.8  | 88.0  | 5.8   | 184.0  | 158.5  | 84.5  | 0.8  |
| JV61204-1-23    | 303  | 2648  | 2.1 | 0.0899 | 14.8  | 0.0130 | 2.5 | 0.17 | 83.1  | 2.0  | 87.4  | 12.4  | 207.7  | 340.6  | 83.1  | 2.0  |
| JV61204-1-24    | 430  | 2810  | 1.8 | 0.0933 | 11.0  | 0.0127 | 1.2 | 0.11 | 81.6  | 0.9  | 90.5  | 9.5   | 332.7  | 248.8  | 81.6  | 0.9  |
| <b>standard</b> | 518  | 30034 | 4.3 | 0.7396 | 3.4   | 0.0921 | 1.6 | 0.47 | 568.0 | 8.9  | 562.2 | 14.8  | 538.6  | 66.1   | 568.0 | 8.9  |
| <b>standard</b> | 545  | 33986 | 3.5 | 0.7412 | 2.9   | 0.0908 | 1.0 | 0.34 | 560.1 | 5.3  | 563.1 | 12.4  | 575.2  | 58.6   | 560.1 | 5.3  |

Sample JV62004-1

|                 |     |       |     |         |      |         |     |      |       |     |       |      |        |       |       |     |
|-----------------|-----|-------|-----|---------|------|---------|-----|------|-------|-----|-------|------|--------|-------|-------|-----|
| <b>standard</b> | 535 | 27873 | 4.4 | 0.74247 | 2.3  | 0.09112 | 1.0 | 0.44 | 562.2 | 5.4 | 563.8 | 9.9  | 570.6  | 44.9  | 562.2 | 5.4 |
| <b>standard</b> | 568 | 48257 | 4.6 | 0.73075 | 2.4  | 0.09012 | 1.2 | 0.50 | 556.2 | 6.4 | 557.0 | 10.3 | 560.1  | 45.6  | 556.2 | 6.4 |
| <b>standard</b> | 506 | 36662 | 3.6 | 0.75221 | 2.9  | 0.09106 | 1.0 | 0.35 | 561.8 | 5.4 | 569.5 | 12.4 | 600.2  | 57.9  | 561.8 | 5.4 |
| <b>standard</b> | 518 | 42672 | 4.5 | 0.73789 | 2.8  | 0.09095 | 1.1 | 0.40 | 561.1 | 6.1 | 561.2 | 12.1 | 561.3  | 56.1  | 561.1 | 6.1 |
| <b>standard</b> | 493 | 40812 | 4.4 | 0.74835 | 3.3  | 0.09335 | 1.2 | 0.36 | 575.3 | 6.4 | 567.3 | 14.2 | 535.0  | 66.6  | 575.3 | 6.4 |
| JV62004-1-01    | 373 | 1611  | 2.2 | 0.16683 | 15.4 | 0.01838 | 4.1 | 0.27 | 117.4 | 4.8 | 156.7 | 22.4 | 800.4  | 313.3 | 117.4 | 4.8 |
| JV62004-1-02    | 310 | 2528  | 1.3 | 0.15963 | 11.6 | 0.01816 | 4.2 | 0.36 | 116.0 | 4.9 | 150.4 | 16.2 | 733.1  | 229.2 | 116.0 | 4.9 |
| JV62004-1-04    | 308 | 1536  | 2.8 | 0.25540 | 25.9 | 0.02154 | 6.9 | 0.27 | 137.4 | 9.4 | 231.0 | 53.6 | 1338.4 | 490.6 | 137.4 | 9.4 |
| <b>standard</b> | 492 | 49018 | 4.6 | 0.74326 | 2.8  | 0.09236 | 1.5 | 0.56 | 569.5 | 8.4 | 564.3 | 11.9 | 543.6  | 49.9  | 569.5 | 8.4 |

|                 |      |       |     |         |      |         |      |      |       |      |       |       |        |       |        |       |
|-----------------|------|-------|-----|---------|------|---------|------|------|-------|------|-------|-------|--------|-------|--------|-------|
| JV62004-1-05    | 293  | 617   | 1.7 | 0.29817 | 24.5 | 0.02135 | 7.4  | 0.30 | 136.2 | 10.0 | 265.0 | 57.3  | 1647.5 | 439.9 | 136.2  | 10.0  |
| JV62004-1-06    | 1034 | 3537  | 1.1 | 0.15573 | 21.0 | 0.01693 | 3.9  | 0.19 | 108.2 | 4.2  | 147.0 | 28.8  | 829.2  | 435.0 | 108.2  | 4.2   |
| <b>standard</b> | 479  | 39996 | 3.7 | 0.73704 | 3.3  | 0.09071 | 1.0  | 0.30 | 559.7 | 5.4  | 560.7 | 14.3  | 564.5  | 69.1  | 559.7  | 5.4   |
| JV62004-1-09    | 329  | 1467  | 1.8 | 0.12239 | 20.3 | 0.01250 | 3.2  | 0.16 | 80.1  | 2.6  | 117.2 | 22.4  | 957.5  | 412.8 | 80.1   | 2.6   |
| JV62004-1-10    | 250  | 1476  | 2.0 | 0.23901 | 25.7 | 0.02112 | 4.6  | 0.18 | 134.8 | 6.2  | 217.6 | 50.3  | 1246.9 | 502.0 | 134.8  | 6.2   |
| JV62004-1-12    | 402  | 4177  | 1.0 | 0.13878 | 13.9 | 0.01817 | 5.3  | 0.38 | 116.1 | 6.1  | 132.0 | 17.2  | 428.1  | 288.7 | 116.1  | 6.1   |
| <b>standard</b> | 509  | 35984 | 4.5 | 0.73477 | 2.6  | 0.09001 | 1.6  | 0.64 | 555.6 | 8.7  | 559.3 | 11.0  | 574.6  | 42.9  | 555.6  | 8.7   |
| JV62004-1-13    | 133  | 1859  | 2.1 | 0.20071 | 33.2 | 0.01980 | 5.5  | 0.17 | 126.4 | 6.9  | 185.7 | 56.3  | 1028.1 | 679.2 | 126.4  | 6.9   |
| JV62004-1-14    | 152  | 2316  | 2.0 | 0.13071 | 35.0 | 0.01863 | 3.8  | 0.11 | 119.0 | 4.5  | 124.7 | 41.1  | 236.2  | 826.0 | 119.0  | 4.5   |
| JV62004-1-15    | 309  | 3744  | 1.1 | 0.15108 | 16.6 | 0.01827 | 5.3  | 0.32 | 116.7 | 6.1  | 142.9 | 22.1  | 602.6  | 341.6 | 116.7  | 6.1   |
| JV62004-1-16    | 276  | 2141  | 0.5 | 0.13001 | 28.0 | 0.01562 | 5.5  | 0.20 | 99.9  | 5.5  | 124.1 | 32.7  | 616.7  | 603.0 | 99.9   | 5.5   |
| <b>standard</b> | 488  | 40675 | 4.4 | 0.75859 | 3.0  | 0.09325 | 1.6  | 0.53 | 574.7 | 8.8  | 573.2 | 13.1  | 567.2  | 55.1  | 574.7  | 8.8   |
| JV62004-1-18    | 227  | 2089  | 1.7 | 0.16384 | 17.4 | 0.01909 | 5.1  | 0.29 | 121.9 | 6.2  | 154.1 | 24.9  | 682.1  | 358.5 | 121.9  | 6.2   |
| JV62004-1-19    | 277  | 449   | 1.6 | 0.39423 | 35.6 | 0.02275 | 10.0 | 0.28 | 145.0 | 14.4 | 337.5 | 102.5 | 2038.3 | 623.6 | 2038.3 | 623.6 |
| JV62004-1-20    | 290  | 3701  | 1.5 | 0.14036 | 25.3 | 0.01906 | 2.5  | 0.10 | 121.7 | 3.0  | 133.4 | 31.6  | 346.6  | 577.4 | 121.7  | 3.0   |
| <b>standard</b> | 469  | 40216 | 4.6 | 0.75341 | 2.7  | 0.09273 | 1.3  | 0.48 | 571.6 | 7.2  | 570.2 | 12.0  | 564.4  | 52.5  | 571.6  | 7.2   |
| JV62004-1-23    | 1137 | 1226  | 0.4 | 0.17062 | 23.0 | 0.01689 | 4.2  | 0.18 | 108.0 | 4.5  | 160.0 | 34.1  | 1021.2 | 464.0 | 108.0  | 4.5   |
| <b>standard</b> | 461  | 53897 | 3.5 | 0.74778 | 3.4  | 0.09011 | 1.0  | 0.30 | 556.2 | 5.3  | 566.9 | 14.6  | 610.3  | 69.4  | 556.2  | 5.3   |
| <b>standard</b> | 505  | 35166 | 4.5 | 0.73135 | 3.0  | 0.09037 | 1.2  | 0.40 | 557.7 | 6.4  | 557.3 | 12.9  | 555.9  | 60.1  | 557.7  | 6.4   |

Sample JV70905-1

|                 |     |        |     |        |      |        |     |      |       |      |       |      |       |       |       |      |
|-----------------|-----|--------|-----|--------|------|--------|-----|------|-------|------|-------|------|-------|-------|-------|------|
| <b>standard</b> | 521 | 80455  | 3.5 | 0.7287 | 2.5  | 0.0910 | 1.7 | 0.65 | 561.3 | 8.9  | 555.8 | 10.8 | 533.3 | 41.8  | 561.3 | 8.9  |
| <b>standard</b> | 506 | 95245  | 5.3 | 0.7486 | 2.2  | 0.0908 | 1.3 | 0.59 | 560.1 | 7.0  | 567.4 | 9.6  | 596.6 | 38.6  | 560.1 | 7.0  |
| <b>standard</b> | 528 | 92295  | 5.3 | 0.7403 | 2.6  | 0.0916 | 1.0 | 0.38 | 564.7 | 5.4  | 562.6 | 11.3 | 553.9 | 52.8  | 564.7 | 5.4  |
| <b>standard</b> | 512 | 100750 | 5.1 | 0.7590 | 2.6  | 0.0929 | 2.1 | 0.79 | 572.8 | 11.3 | 573.5 | 11.5 | 576.0 | 35.2  | 572.8 | 11.3 |
| <b>standard</b> | 520 | 81060  | 5.0 | 0.7442 | 3.8  | 0.0903 | 1.7 | 0.44 | 557.5 | 9.1  | 564.9 | 16.6 | 594.9 | 74.6  | 557.5 | 9.1  |
| JV70905-1-01    | 315 | 11570  | 2.2 | 0.1645 | 9.6  | 0.0224 | 1.1 | 0.11 | 143.0 | 1.5  | 154.7 | 13.7 | 336.8 | 215.5 | 143.0 | 1.5  |
| JV70905-1-02    | 438 | 11420  | 1.4 | 0.1479 | 4.7  | 0.0215 | 2.2 | 0.47 | 137.1 | 3.0  | 140.0 | 6.2  | 190.4 | 97.4  | 137.1 | 3.0  |
| JV70905-1-03    | 470 | 16215  | 1.8 | 0.1607 | 7.3  | 0.0225 | 1.3 | 0.17 | 143.4 | 1.8  | 151.3 | 10.2 | 276.5 | 164.0 | 143.4 | 1.8  |
| JV70905-1-04    | 314 | 7905   | 2.6 | 0.1410 | 16.6 | 0.0219 | 2.3 | 0.14 | 139.9 | 3.1  | 133.9 | 20.8 | 29.7  | 396.7 | 139.9 | 3.1  |
| JV70905-1-05    | 135 | 7840   | 1.2 | 0.1721 | 16.2 | 0.0230 | 1.4 | 0.09 | 146.9 | 2.1  | 161.2 | 24.2 | 376.9 | 365.8 | 146.9 | 2.1  |
| <b>standard</b> | 522 | 130450 | 5.1 | 0.7362 | 2.8  | 0.0921 | 2.2 | 0.77 | 567.8 | 11.7 | 560.2 | 12.0 | 529.4 | 39.2  | 567.8 | 11.7 |
| JV70905-1-06    | 175 | 11570  | 3.0 | 0.1712 | 11.9 | 0.0219 | 3.0 | 0.25 | 139.8 | 4.2  | 160.5 | 17.7 | 477.4 | 255.6 | 139.8 | 4.2  |
| JV70905-1-07    | 592 | 18055  | 4.0 | 0.1550 | 5.9  | 0.0218 | 1.5 | 0.26 | 139.1 | 2.1  | 146.3 | 8.0  | 265.0 | 130.7 | 139.1 | 2.1  |
| JV70905-1-08    | 300 | 8255   | 2.6 | 0.1496 | 13.4 | 0.0213 | 2.0 | 0.15 | 136.1 | 2.7  | 141.5 | 17.7 | 233.7 | 306.7 | 136.1 | 2.7  |
| JV70905-1-09    | 452 | 12935  | 2.3 | 0.1468 | 8.9  | 0.0211 | 1.8 | 0.20 | 134.3 | 2.3  | 139.1 | 11.6 | 221.3 | 203.0 | 134.3 | 2.3  |
| JV70905-1-10    | 571 | 20315  | 2.7 | 0.1509 | 4.7  | 0.0216 | 1.1 | 0.23 | 137.5 | 1.5  | 142.7 | 6.3  | 229.6 | 106.4 | 137.5 | 1.5  |
| <b>standard</b> | 524 | 91755  | 3.9 | 0.7387 | 3.3  | 0.0908 | 1.8 | 0.54 | 560.1 | 9.5  | 561.7 | 14.1 | 568.0 | 59.7  | 560.1 | 9.5  |
| JV70905-1-11    | 243 | 5630   | 2.4 | 0.1773 | 7.8  | 0.0215 | 1.4 | 0.18 | 137.1 | 1.9  | 165.7 | 12.0 | 597.6 | 167.0 | 137.1 | 1.9  |
| JV70905-1-12    | 363 | 8970   | 2.7 | 0.1495 | 7.3  | 0.0209 | 1.8 | 0.25 | 133.1 | 2.4  | 141.5 | 9.7  | 284.0 | 162.1 | 133.1 | 2.4  |
| JV70905-1-13    | 415 | 12460  | 2.5 | 0.1516 | 5.8  | 0.0210 | 1.1 | 0.19 | 134.0 | 1.5  | 143.3 | 7.8  | 300.2 | 130.4 | 134.0 | 1.5  |
| JV70905-1-14    | 125 | 6215   | 3.1 | 0.1901 | 16.5 | 0.0226 | 2.6 | 0.16 | 144.2 | 3.7  | 176.7 | 26.7 | 636.5 | 352.2 | 144.2 | 3.7  |
| JV70905-1-15    | 577 | 17805  | 1.9 | 0.1472 | 5.2  | 0.0202 | 2.6 | 0.50 | 128.8 | 3.3  | 139.4 | 6.8  | 324.0 | 102.2 | 128.8 | 3.3  |
| <b>standard</b> | 529 | 83355  | 3.4 | 0.7415 | 2.3  | 0.0917 | 1.8 | 0.78 | 565.4 | 9.9  | 563.3 | 10.0 | 554.9 | 31.4  | 565.4 | 9.9  |
| JV70905-1-16    | 146 | 6245   | 2.1 | 0.1681 | 27.0 | 0.0216 | 1.6 | 0.06 | 137.9 | 2.1  | 157.8 | 39.5 | 467.8 | 606.8 | 137.9 | 2.1  |
| JV70905-1-17    | 362 | 14975  | 3.6 | 0.1549 | 10.8 | 0.0213 | 3.9 | 0.36 | 135.6 | 5.2  | 146.2 | 14.7 | 323.1 | 229.1 | 135.6 | 5.2  |
| JV70905-1-18    | 236 | 7500   | 2.8 | 0.1583 | 20.2 | 0.0218 | 1.0 | 0.05 | 138.8 | 1.4  | 149.2 | 28.0 | 317.8 | 462.8 | 138.8 | 1.4  |
| JV70905-1-19    | 453 | 16995  | 3.4 | 0.1513 | 5.1  | 0.0215 | 1.9 | 0.37 | 137.0 | 2.6  | 143.0 | 6.8  | 244.9 | 108.3 | 137.0 | 2.6  |
| JV70905-1-20    | 271 | 6070   | 2.2 | 0.1669 | 10.4 | 0.0214 | 1.0 | 0.10 | 136.8 | 1.4  | 156.8 | 15.1 | 470.2 | 230.3 | 136.8 | 1.4  |
| <b>standard</b> | 496 | 91935  | 4.9 | 0.7558 | 1.9  | 0.0924 | 1.0 | 0.54 | 570.0 | 5.5  | 571.6 | 8.1  | 578.0 | 33.9  | 570.0 | 5.5  |
| <b>standard</b> | 517 | 73345  | 5.0 | 0.7352 | 2.7  | 0.0919 | 1.2 | 0.44 | 566.7 | 6.6  | 559.6 | 11.8 | 531.1 | 53.9  | 566.7 | 6.6  |
| <b>standard</b> | 510 | 82940  | 3.8 | 0.7391 | 2.5  | 0.0907 | 1.4 | 0.56 | 559.7 | 7.6  | 561.9 | 10.8 | 570.7 | 45.1  | 559.7 | 7.6  |
| <b>standard</b> | 515 | 95495  | 3.4 | 0.7473 | 2.0  | 0.0915 | 1.5 | 0.74 | 564.4 | 7.8  | 566.7 | 8.5  | 575.6 | 28.9  | 564.4 | 7.8  |
| <b>standard</b> | 534 | 85440  | 5.0 | 0.7418 | 2.6  | 0.0916 | 1.7 | 0.62 | 564.8 | 8.9  | 563.5 | 11.4 | 558.1 | 45.1  | 564.8 | 8.9  |

Sample JV63004-1

|                 |     |       |     |        |      |        |     |      |        |      |        |      |        |       |       |     |
|-----------------|-----|-------|-----|--------|------|--------|-----|------|--------|------|--------|------|--------|-------|-------|-----|
| <b>standard</b> | 518 | 36416 | 4.7 | 0.7452 | 2.4  | 0.0921 | 1.2 | 0.48 | 567.9  | 6.3  | 565.4  | 10.5 | 555.5  | 46.3  | 567.9 | 6.3 |
| <b>standard</b> | 514 | 27668 | 4.0 | 0.7395 | 3.1  | 0.0906 | 1.5 | 0.50 | 559.0  | 8.2  | 562.1  | 13.4 | 574.8  | 58.3  | 559.0 | 8.2 |
| JV63004-1-01    | 642 | 12390 | 1.7 | 0.2986 | 3.5  | 0.0402 | 2.6 | 0.74 | 254.3  | 6.5  | 265.3  | 8.2  | 363.4  | 53.2  | 109.4 | 2.7 |
| JV63004-1-02    | 538 | 5574  | 4.9 | 0.1304 | 6.8  | 0.0188 | 0.8 | 0.12 | 120.0  | 1.0  | 124.4  | 8.0  | 210.2  | 157.0 | 114.1 | 2.5 |
| JV63004-1-03    | 117 | 22670 | 2.4 | 8.3832 | 3.0  | 0.3965 | 1.4 | 0.46 | 2152.8 | 25.6 | 2273.4 | 27.5 | 2383.6 | 45.8  | 114.2 | 3.3 |
| JV63004-1-04    | 208 | 3210  | 2.1 | 0.1419 | 11.9 | 0.0189 | 3.0 | 0.25 | 120.9  | 3.5  | 134.7  | 15.0 | 387.1  | 260.2 | 114.2 | 1.6 |

|                 |     |       |     |        |      |        |     |      |        |      |        |      |        |       |        |      |
|-----------------|-----|-------|-----|--------|------|--------|-----|------|--------|------|--------|------|--------|-------|--------|------|
| JV63004-1-04R   | 345 | 4284  | 4.3 | 0.1334 | 13.5 | 0.0188 | 1.7 | 0.13 | 119.8  | 2.1  | 127.2  | 16.2 | 267.6  | 308.5 | 114.6  | 3.5  |
| <b>standard</b> | 523 | 35940 | 4.0 | 0.7257 | 4.2  | 0.0901 | 3.2 | 0.77 | 556.3  | 17.3 | 554.0  | 17.9 | 544.8  | 58.4  | 556.3  | 17.3 |
| JV63004-1-05    | 311 | 4492  | 2.6 | 0.1291 | 9.2  | 0.0190 | 2.5 | 0.27 | 121.6  | 3.0  | 123.3  | 10.7 | 156.2  | 208.9 | 116.1  | 1.3  |
| JV63004-1-06    | 449 | 5508  | 4.4 | 0.1311 | 8.6  | 0.0184 | 2.3 | 0.27 | 117.6  | 2.7  | 125.1  | 10.1 | 268.4  | 189.2 | 116.1  | 1.2  |
| JV63004-1-07    | 505 | 6100  | 3.5 | 0.1245 | 6.2  | 0.0179 | 1.4 | 0.23 | 114.2  | 1.6  | 119.2  | 7.0  | 219.1  | 139.7 | 116.8  | 2.0  |
| JV63004-1-08    | 637 | 9578  | 4.2 | 0.2983 | 4.9  | 0.0328 | 1.4 | 0.29 | 208.0  | 2.9  | 265.1  | 11.4 | 805.5  | 98.1  | 117.6  | 2.7  |
| JV63004-1-09    | 461 | 4906  | 3.6 | 0.1286 | 7.5  | 0.0183 | 1.7 | 0.23 | 116.8  | 2.0  | 122.9  | 8.7  | 241.2  | 168.1 | 117.9  | 1.2  |
| <b>standard</b> | 499 | 25288 | 4.4 | 0.7464 | 2.8  | 0.0916 | 1.8 | 0.63 | 565.0  | 9.5  | 566.1  | 12.0 | 570.6  | 46.4  | 565.0  | 9.5  |
| JV63004-1-10    | 494 | 6496  | 3.8 | 0.1410 | 5.2  | 0.0193 | 1.8 | 0.33 | 123.5  | 2.1  | 133.9  | 6.6  | 323.2  | 111.9 | 117.9  | 1.4  |
| JV63004-1-11    | 367 | 4328  | 4.0 | 0.1247 | 6.1  | 0.0185 | 1.2 | 0.20 | 117.9  | 1.4  | 119.3  | 6.9  | 146.9  | 140.4 | 119.0  | 1.5  |
| JV63004-1-12    | 469 | 6044  | 4.5 | 0.1137 | 8.3  | 0.0179 | 3.1 | 0.37 | 114.6  | 3.5  | 109.3  | 8.6  | -4.1   | 186.9 | 119.8  | 2.1  |
| JV63004-1-13    | 210 | 4246  | 2.8 | 0.2389 | 9.9  | 0.0331 | 1.1 | 0.12 | 210.2  | 2.4  | 217.5  | 19.3 | 297.5  | 224.4 | 120.0  | 1.0  |
| JV63004-1-14    | 374 | 4616  | 1.7 | 0.2026 | 7.4  | 0.0269 | 3.1 | 0.41 | 171.4  | 5.2  | 187.3  | 12.6 | 393.0  | 150.4 | 120.9  | 3.5  |
| <b>standard</b> | 534 | 33890 | 5.2 | 0.7517 | 2.7  | 0.0924 | 1.0 | 0.36 | 569.7  | 5.4  | 569.2  | 11.8 | 567.2  | 55.2  | 569.7  | 5.4  |
| JV63004-1-15    | 316 | 3062  | 4.0 | 0.1396 | 8.3  | 0.0185 | 1.0 | 0.12 | 117.9  | 1.2  | 132.7  | 10.3 | 406.7  | 185.1 | 121.6  | 3.0  |
| JV63004-1-16    | 468 | 4626  | 4.2 | 0.1175 | 8.5  | 0.0182 | 1.1 | 0.13 | 116.1  | 1.2  | 112.8  | 9.1  | 43.4   | 203.0 | 123.5  | 2.1  |
| JV63004-1-17    | 391 | 5470  | 3.8 | 0.1252 | 23.0 | 0.0182 | 1.1 | 0.05 | 116.1  | 1.3  | 119.8  | 25.9 | 193.3  | 539.3 | 131.0  | 2.2  |
| JV63004-1-18    | 506 | 5456  | 3.9 | 0.1166 | 7.3  | 0.0179 | 2.2 | 0.30 | 114.1  | 2.5  | 112.0  | 7.8  | 65.6   | 167.0 | 171.4  | 5.2  |
| JV63004-1-19    | 444 | 6172  | 5.5 | 0.1336 | 8.1  | 0.0205 | 1.7 | 0.21 | 131.0  | 2.2  | 127.3  | 9.7  | 58.1   | 189.8 | 208.0  | 2.9  |
| <b>standard</b> | 524 | 39036 | 4.4 | 0.7472 | 2.9  | 0.0916 | 2.1 | 0.73 | 564.9  | 11.4 | 566.6  | 12.5 | 573.3  | 42.7  | 564.9  | 11.4 |
| JV63004-1-20    | 405 | 2648  | 3.2 | 0.1323 | 8.9  | 0.0186 | 1.2 | 0.14 | 119.0  | 1.5  | 126.2  | 10.5 | 263.3  | 202.2 | 210.2  | 2.4  |
| JV63004-1-21    | 489 | 4974  | 3.2 | 0.1320 | 11.4 | 0.0179 | 2.9 | 0.25 | 114.2  | 3.3  | 125.9  | 13.5 | 352.2  | 250.0 | 215.1  | 5.7  |
| JV63004-1-22    | 294 | 64950 | 1.8 | 8.7681 | 1.5  | 0.3639 | 0.5 | 0.34 | 2000.8 | 8.6  | 2314.2 | 13.4 | 2603.5 | 23.0  | 254.3  | 6.5  |
| JV63004-1-23    | 418 | 3796  | 1.5 | 0.1165 | 9.2  | 0.0171 | 2.5 | 0.27 | 109.4  | 2.7  | 111.9  | 9.7  | 164.4  | 207.5 | 2383.6 | 45.8 |
| JV63004-1-24    | 367 | 6990  | 2.6 | 0.2403 | 4.8  | 0.0339 | 2.7 | 0.56 | 215.1  | 5.7  | 218.7  | 9.5  | 256.8  | 91.4  | 2603.5 | 23.0 |
| <b>standard</b> | 515 | 26926 | 4.3 | 0.7468 | 2.9  | 0.0929 | 1.9 | 0.66 | 572.9  | 10.3 | 566.4  | 12.4 | 540.2  | 47.3  | 572.9  | 10.3 |
| <b>standard</b> | 516 | 27094 | 4.1 | 0.7241 | 2.2  | 0.0891 | 1.1 | 0.50 | 550.0  | 5.7  | 553.1  | 9.3  | 565.8  | 41.4  | 550.0  | 5.7  |

#### Sample DE-000-DZ

|                 |     |       |     |          |      |         |     |      |        |      |        |      |        |       |        |      |
|-----------------|-----|-------|-----|----------|------|---------|-----|------|--------|------|--------|------|--------|-------|--------|------|
| DE-000-1        | 79  | 1380  | 1.0 | 0.11703  | 16.8 | 0.02011 | 9.6 | 0.57 | 128.4  | 12.1 | 112.4  | 17.9 | -214.3 | 349.7 | 128.4  | 12.1 |
| DE-000-2        | 86  | 27299 | 0.5 | 11.22516 | 3.7  | 0.48555 | 2.2 | 0.59 | 2551.4 | 46.3 | 2542.0 | 34.6 | 2534.5 | 50.2  | 2534.5 | 50.2 |
| DE-000-3        | 600 | 6396  | 2.5 | 0.12991  | 3.7  | 0.01921 | 2.7 | 0.72 | 122.7  | 3.2  | 124.0  | 4.3  | 150.0  | 60.8  | 122.7  | 3.2  |
| DE-000-4        | 522 | 19894 | 1.1 | 1.74615  | 5.9  | 0.17022 | 5.4 | 0.92 | 1013.3 | 50.4 | 1025.7 | 37.8 | 1052.3 | 47.1  | 1052.3 | 47.1 |
| DE-000-5        | 131 | 1530  | 0.7 | 0.09857  | 11.3 | 0.01450 | 4.2 | 0.38 | 92.8   | 3.9  | 95.5   | 10.3 | 161.8  | 244.3 | 92.8   | 3.9  |
| <b>standard</b> | 609 | 43186 | 3.7 | 0.72990  | 2.0  | 0.09068 | 1.5 | 0.74 | 559.6  | 7.9  | 556.5  | 8.5  | 543.8  | 29.1  | 559.6  | 7.9  |
| DE-000-6        | 314 | 27823 | 1.4 | 1.18327  | 2.8  | 0.13068 | 1.5 | 0.53 | 791.7  | 11.2 | 792.8  | 15.6 | 795.9  | 50.6  | 791.7  | 11.2 |
| DE-000-7        | 134 | 14231 | 0.6 | 1.56265  | 3.8  | 0.15734 | 2.8 | 0.74 | 942.0  | 24.8 | 955.5  | 23.6 | 986.8  | 51.8  | 942.0  | 24.8 |
| DE-000-8        | 244 | 4533  | 1.6 | 0.12850  | 7.4  | 0.02006 | 3.7 | 0.50 | 128.0  | 4.7  | 122.8  | 8.6  | 21.9   | 154.1 | 128.0  | 4.7  |
| DE-000-9        | 121 | 40300 | 1.5 | 10.38027 | 2.0  | 0.45545 | 1.3 | 0.65 | 2419.4 | 26.7 | 2469.3 | 19.0 | 2510.6 | 26.2  | 2510.6 | 26.2 |
| DE-000-10       | 108 | 1505  | 1.4 | 0.14465  | 8.9  | 0.02024 | 5.2 | 0.59 | 129.2  | 6.7  | 137.2  | 11.4 | 278.2  | 164.4 | 129.2  | 6.7  |
| <b>standard</b> | 572 | 37912 | 3.3 | 0.75991  | 1.9  | 0.09314 | 1.6 | 0.84 | 574.1  | 8.6  | 574.0  | 8.2  | 573.5  | 21.8  | 574.1  | 8.6  |
| DE-000-11       | 86  | 1603  | 1.0 | 0.11864  | 21.5 | 0.02016 | 6.3 | 0.29 | 128.6  | 8.0  | 113.8  | 23.2 | -185.8 | 519.3 | 128.6  | 8.0  |
| DE-000-12       | 215 | 33828 | 1.5 | 2.25006  | 2.7  | 0.20578 | 2.0 | 0.75 | 1206.3 | 22.5 | 1196.8 | 19.3 | 1179.7 | 36.2  | 1179.7 | 36.2 |
| DE-000-13       | 217 | 3914  | 1.2 | 0.15410  | 9.6  | 0.02150 | 7.6 | 0.80 | 137.1  | 10.4 | 145.5  | 13.0 | 284.5  | 133.0 | 137.1  | 10.4 |
| DE-000-14       | 105 | 1553  | 1.1 | 0.12493  | 16.2 | 0.01878 | 4.6 | 0.29 | 120.0  | 5.5  | 119.5  | 18.3 | 110.9  | 368.5 | 120.0  | 5.5  |
| DE-000-15       | 93  | 1553  | 0.9 | 0.12236  | 12.1 | 0.01971 | 5.1 | 0.42 | 125.9  | 6.3  | 117.2  | 13.4 | -54.8  | 267.4 | 125.9  | 6.3  |
| <b>standard</b> | 530 | 38211 | 2.7 | 0.74071  | 1.9  | 0.09084 | 1.3 | 0.68 | 560.5  | 6.9  | 562.8  | 8.2  | 572.1  | 30.2  | 560.5  | 6.9  |
| DE-000-16       | 84  | 22194 | 0.3 | 11.02210 | 3.2  | 0.47808 | 2.1 | 0.65 | 2518.9 | 42.8 | 2525.0 | 29.5 | 2529.9 | 40.5  | 2529.9 | 40.5 |
| DE-000-17       | 243 | 3979  | 0.7 | 0.15107  | 10.1 | 0.02199 | 7.2 | 0.71 | 140.2  | 9.9  | 142.9  | 13.5 | 187.4  | 165.8 | 140.2  | 9.9  |
| DE-000-18       | 698 | 8328  | 0.6 | 0.57447  | 4.6  | 0.07047 | 2.5 | 0.55 | 439.0  | 10.7 | 460.9  | 16.9 | 571.6  | 83.0  | 439.0  | 10.7 |
| DE-000-19       | 431 | 27745 | 7.7 | 0.77180  | 2.0  | 0.09410 | 1.1 | 0.56 | 579.7  | 6.1  | 580.8  | 8.7  | 585.0  | 35.3  | 579.7  | 6.1  |
| DE-000-20       | 262 | 42723 | 1.9 | 3.90014  | 7.5  | 0.26845 | 6.0 | 0.81 | 1532.9 | 82.5 | 1613.7 | 60.3 | 1720.8 | 80.2  | 1720.8 | 80.2 |
| <b>standard</b> | 576 | 41533 | 2.7 | 0.71340  | 2.2  | 0.08772 | 1.0 | 0.45 | 542.0  | 5.2  | 546.8  | 9.5  | 566.5  | 43.8  | 542.0  | 5.2  |
| DE-000-S21      | 207 | 1841  | 1.2 | 0.15906  | 10.3 | 0.02091 | 4.3 | 0.42 | 133.4  | 5.7  | 149.9  | 14.4 | 418.6  | 209.6 | 133.4  | 5.7  |
| DE-000-S22      | 344 | 59877 | 3.8 | 4.06578  | 6.6  | 0.25937 | 5.8 | 0.89 | 1486.6 | 77.5 | 1647.5 | 53.6 | 1859.2 | 54.6  | 1859.2 | 54.6 |
| DE-000-S23      | 209 | 2746  | 2.0 | 0.13134  | 4.8  | 0.01962 | 2.2 | 0.45 | 125.3  | 2.7  | 125.3  | 5.7  | 125.9  | 100.7 | 125.3  | 2.7  |
| DE-000-S24      | 180 | 2336  | 0.8 | 0.13264  | 8.6  | 0.01986 | 5.5 | 0.64 | 126.8  | 6.9  | 126.5  | 10.3 | 120.5  | 156.5 | 126.8  | 6.9  |
| <b>standard</b> | 576 | 42075 | 3.3 | 0.74506  | 1.6  | 0.09219 | 1.0 | 0.61 | 568.5  | 5.4  | 565.4  | 7.1  | 552.8  | 28.2  | 568.5  | 5.4  |
| DE-000-26       | 172 | 3574  | 0.9 | 0.15772  | 13.7 | 0.02150 | 7.8 | 0.57 | 137.1  | 10.5 | 148.7  | 19.0 | 337.6  | 256.6 | 137.1  | 10.5 |
| DE-000-27       | 131 | 2363  | 0.9 | 0.11825  | 10.5 | 0.01880 | 3.8 | 0.36 | 120.1  | 4.6  | 113.5  | 11.3 | -23.2  | 237.6 | 120.1  | 4.6  |
| DE-000-28       | 81  | 1214  | 1.1 | 0.11209  | 11.5 | 0.01829 | 5.2 | 0.46 | 116.9  | 6.0  | 107.9  | 11.7 | -86.0  | 250.4 | 116.9  | 6.0  |
| DE-000-30       | 110 | 1713  | 0.9 | 0.13877  | 9.2  | 0.01890 | 5.1 | 0.55 | 120.7  | 6.1  | 131.9  | 11.3 | 339.1  | 173.2 | 120.7  | 6.1  |



|                 |     |       |      |          |      |         |     |      |        |       |        |      |        |       |        |      |
|-----------------|-----|-------|------|----------|------|---------|-----|------|--------|-------|--------|------|--------|-------|--------|------|
| <b>standard</b> | 688 | 50210 | 3.8  | 0.74227  | 2.0  | 0.09165 | 1.3 | 0.67 | 565.3  | 7.2   | 563.7  | 8.5  | 557.5  | 31.9  | 565.3  | 7.2  |
| DE-000-31       | 126 | 1609  | 1.3  | 0.12551  | 12.7 | 0.01953 | 6.2 | 0.49 | 124.7  | 7.6   | 120.1  | 14.4 | 29.4   | 267.1 | 124.7  | 7.6  |
| DE-000-32       | 483 | 35334 | 2.1  | 2.10271  | 3.9  | 0.19666 | 3.2 | 0.81 | 1157.3 | 34.0  | 1149.7 | 27.1 | 1135.3 | 45.6  | 1135.3 | 45.6 |
| DE-000-33       | 156 | 1566  | 0.5  | 0.11519  | 12.1 | 0.01616 | 5.5 | 0.46 | 103.4  | 5.7   | 110.7  | 12.7 | 271.3  | 247.6 | 103.4  | 5.7  |
| DE-000-34       | 260 | 67760 | 1.2  | 10.49057 | 1.8  | 0.46952 | 1.3 | 0.76 | 2481.5 | 27.4  | 2479.1 | 16.3 | 2477.1 | 19.4  | 2477.1 | 19.4 |
| DE-000-35       | 374 | 26854 | 5.2  | 1.00331  | 1.7  | 0.11457 | 1.1 | 0.67 | 699.2  | 7.5   | 705.5  | 8.7  | 725.5  | 26.9  | 699.2  | 7.5  |
| <b>standard</b> | 553 | 36780 | 3.9  | 0.74193  | 3.0  | 0.09118 | 1.2 | 0.40 | 562.5  | 6.5   | 563.5  | 13.1 | 567.6  | 60.6  | 562.5  | 6.5  |
| DE-000-36       | 260 | 2917  | 0.7  | 0.12050  | 10.0 | 0.01816 | 7.8 | 0.78 | 116.0  | 9.0   | 115.5  | 11.0 | 105.4  | 148.7 | 116.0  | 9.0  |
| DE-000-39       | 193 | 3129  | 1.4  | 0.13272  | 6.3  | 0.01994 | 4.2 | 0.66 | 127.3  | 5.3   | 126.5  | 7.5  | 112.1  | 111.4 | 127.3  | 5.3  |
| DE-000-38       | 65  | 1465  | 1.1  | 0.15392  | 15.2 | 0.02022 | 7.0 | 0.46 | 129.0  | 8.9   | 145.4  | 20.6 | 421.0  | 302.9 | 129.0  | 8.9  |
| DE-000-40       | 166 | 11135 | 0.6  | 0.72184  | 3.5  | 0.08864 | 2.2 | 0.64 | 547.5  | 11.7  | 551.8  | 14.7 | 569.4  | 57.6  | 547.5  | 11.7 |
| <b>standard</b> | 500 | 45740 | 3.7  | 0.73243  | 3.1  | 0.09078 | 1.4 | 0.47 | 560.2  | 7.8   | 558.0  | 13.3 | 549.1  | 60.1  | 560.2  | 7.8  |
| DE-000-41       | 179 | 2672  | 0.7  | 0.12616  | 9.2  | 0.02015 | 5.9 | 0.64 | 128.6  | 7.6   | 120.6  | 10.5 | -33.0  | 170.8 | 128.6  | 7.6  |
| DE-000-42       | 141 | 2692  | 1.2  | 0.13369  | 12.2 | 0.01967 | 7.6 | 0.63 | 125.5  | 9.5   | 127.4  | 14.6 | 162.3  | 222.3 | 125.5  | 9.5  |
| DE-000-43       | 96  | 47290 | 0.9  | 5.41645  | 5.2  | 0.34271 | 4.6 | 0.89 | 1899.7 | 75.9  | 1887.5 | 44.4 | 1874.0 | 42.4  | 1874.0 | 42.4 |
| DE-000-44       | 86  | 2293  | 1.5  | 0.14095  | 15.1 | 0.02088 | 4.8 | 0.32 | 133.2  | 6.3   | 133.9  | 19.0 | 145.6  | 337.6 | 133.2  | 6.3  |
| DE-000-45       | 92  | 2758  | 1.5  | 0.13052  | 9.0  | 0.02031 | 4.0 | 0.45 | 129.6  | 5.2   | 124.6  | 10.5 | 29.4   | 192.4 | 129.6  | 5.2  |
| <b>standard</b> | 334 | 31847 | 2.9  | 0.78119  | 2.8  | 0.09429 | 1.9 | 0.69 | 580.9  | 10.6  | 586.2  | 12.3 | 606.6  | 42.9  | 580.9  | 10.6 |
| DE-000-46       | 201 | 3236  | 1.0  | 0.13154  | 6.4  | 0.01917 | 4.3 | 0.68 | 122.4  | 5.2   | 125.5  | 7.5  | 184.2  | 109.2 | 122.4  | 5.2  |
| DE-000-47       | 150 | 18138 | 1.8  | 2.63035  | 5.9  | 0.21301 | 5.3 | 0.90 | 1244.9 | 60.1  | 1309.2 | 43.6 | 1416.1 | 50.2  | 1416.1 | 50.2 |
| DE-000-48       | 201 | 3416  | 1.9  | 0.12410  | 7.0  | 0.01958 | 4.0 | 0.57 | 125.0  | 4.9   | 118.8  | 7.9  | -4.4   | 140.1 | 125.0  | 4.9  |
| DE-000-49       | 184 | 42110 | 0.6  | 4.89834  | 2.7  | 0.31494 | 1.2 | 0.44 | 1765.0 | 18.3  | 1802.0 | 22.8 | 1845.0 | 44.0  | 1845.0 | 44.0 |
| DE-000-50       | 237 | 4018  | 1.2  | 0.13832  | 5.6  | 0.02039 | 3.9 | 0.71 | 130.1  | 5.1   | 131.5  | 6.9  | 157.7  | 91.8  | 130.1  | 5.1  |
| <b>standard</b> | 469 | 35945 | 3.8  | 0.74444  | 1.6  | 0.09068 | 1.0 | 0.63 | 559.6  | 5.4   | 565.0  | 6.9  | 586.9  | 27.1  | 559.6  | 5.4  |
| DE-000-51       | 206 | 26857 | 2.1  | 2.17137  | 2.1  | 0.19982 | 1.2 | 0.57 | 1174.4 | 12.5  | 1171.9 | 14.3 | 1167.4 | 33.5  | 1167.4 | 33.5 |
| DE-000-52       | 368 | 7344  | 1.1  | 0.14458  | 4.7  | 0.02106 | 3.1 | 0.67 | 134.4  | 4.2   | 137.1  | 6.0  | 185.0  | 81.4  | 134.4  | 4.2  |
| DE-000-53       | 244 | 4521  | 1.3  | 0.14064  | 8.2  | 0.01981 | 4.5 | 0.55 | 126.4  | 5.6   | 133.6  | 10.3 | 263.1  | 158.5 | 126.4  | 5.6  |
| DE-000-54       | 130 | 2069  | 1.1  | 0.11615  | 10.5 | 0.01879 | 3.9 | 0.37 | 120.0  | 4.6   | 111.6  | 11.0 | -65.1  | 237.5 | 120.0  | 4.6  |
| DE-000-55       | 109 | 1880  | 1.3  | 0.11786  | 13.7 | 0.01913 | 4.2 | 0.31 | 122.1  | 5.1   | 113.1  | 14.7 | -72.5  | 320.7 | 122.1  | 5.1  |
| <b>standard</b> | 418 | 55767 | 3.0  | 0.78243  | 4.4  | 0.09695 | 3.5 | 0.80 | 596.5  | 19.9  | 586.9  | 19.5 | 549.6  | 57.0  | 596.5  | 19.9 |
| DE-000-56       | 453 | 13093 | 1.5  | 0.52925  | 4.1  | 0.06925 | 3.0 | 0.74 | 431.6  | 12.6  | 431.3  | 14.4 | 429.6  | 61.7  | 431.6  | 12.6 |
| DE-000-57       | 179 | 1910  | 1.4  | 0.13395  | 10.9 | 0.01936 | 8.2 | 0.75 | 123.6  | 10.0  | 127.6  | 13.1 | 203.3  | 168.5 | 123.6  | 10.0 |
| DE-000-58       | 178 | 50278 | 1.6  | 6.39572  | 2.3  | 0.37331 | 1.6 | 0.71 | 2044.9 | 28.1  | 2031.7 | 19.8 | 2018.2 | 28.2  | 2018.2 | 28.2 |
| DE-000-59       | 137 | 969   | 1.2  | 0.22631  | 31.7 | 0.02167 | 5.0 | 0.16 | 138.2  | 6.8   | 207.1  | 59.4 | 1088.0 | 642.4 | 138.2  | 6.8  |
| DE-000-60       | 365 | 73309 | 2.8  | 12.66422 | 3.8  | 0.51049 | 3.6 | 0.93 | 2658.7 | 78.0  | 2655.0 | 36.2 | 2652.1 | 23.4  | 2652.1 | 23.4 |
| <b>standard</b> | 444 | 37078 | 3.7  | 0.73289  | 3.8  | 0.09013 | 1.0 | 0.26 | 556.3  | 5.3   | 558.2  | 16.3 | 566.2  | 79.5  | 556.3  | 5.3  |
| DE-000-61       | 323 | 15950 | 0.9  | 0.85321  | 2.6  | 0.10226 | 2.3 | 0.87 | 627.6  | 13.7  | 626.4  | 12.3 | 622.0  | 28.2  | 627.6  | 13.7 |
| DE-000-62       | 252 | 5497  | 1.6  | 0.26237  | 2.2  | 0.03763 | 1.7 | 0.79 | 238.1  | 4.0   | 236.6  | 4.5  | 221.1  | 30.4  | 238.1  | 4.0  |
| DE-000-63       | 190 | 4416  | 1.2  | 0.29916  | 4.0  | 0.04022 | 3.2 | 0.79 | 254.2  | 7.9   | 265.7  | 9.4  | 369.0  | 55.5  | 254.2  | 7.9  |
| DE-000-64       | 257 | 3062  | 0.9  | 0.16840  | 7.8  | 0.02405 | 2.2 | 0.28 | 153.2  | 3.3   | 158.0  | 11.4 | 230.7  | 173.4 | 153.2  | 3.3  |
| DE-000-65       | 101 | 1144  | 1.5  | 0.10527  | 17.0 | 0.01874 | 3.9 | 0.23 | 119.7  | 4.6   | 101.6  | 16.5 | -303.8 | 427.2 | 119.7  | 4.6  |
| <b>standard</b> | 571 | 39239 | 2.8  | 0.72448  | 1.7  | 0.08907 | 1.0 | 0.59 | 550.0  | 5.3   | 553.3  | 7.2  | 566.9  | 29.9  | 550.0  | 5.3  |
| DE-000-66       | 218 | 2321  | 1.2  | 0.11196  | 8.5  | 0.01815 | 3.5 | 0.41 | 116.0  | 4.0   | 107.8  | 8.6  | -70.1  | 188.4 | 116.0  | 4.0  |
| DE-000-67       | 334 | 5537  | 1.5  | 0.57458  | 3.8  | 0.07166 | 3.5 | 0.91 | 446.1  | 15.0  | 461.0  | 14.2 | 535.6  | 34.9  | 446.1  | 15.0 |
| DE-000-68       | 490 | 57533 | 3.0  | 5.26642  | 2.2  | 0.33511 | 1.7 | 0.74 | 1863.1 | 26.8  | 1863.4 | 19.1 | 1863.8 | 27.1  | 1863.8 | 27.1 |
| DE-000-69       | 492 | 2367  | 2.6  | 0.13403  | 4.5  | 0.01784 | 2.9 | 0.65 | 114.0  | 3.3   | 127.7  | 5.4  | 390.8  | 77.9  | 114.0  | 3.3  |
| DE-000-70       | 25  | 1837  | 12.3 | 0.93193  | 8.5  | 0.10697 | 6.5 | 0.77 | 655.1  | 40.6  | 668.6  | 41.5 | 714.5  | 114.7 | 655.1  | 40.6 |
| <b>standard</b> | 662 | 47517 | 3.7  | 0.75345  | 1.9  | 0.09345 | 1.0 | 0.56 | 575.9  | 5.8   | 570.2  | 8.1  | 547.7  | 33.5  | 575.9  | 5.8  |
| DE-000-71       | 212 | 2223  | 0.8  | 0.14417  | 9.4  | 0.01976 | 4.5 | 0.48 | 126.2  | 5.6   | 136.7  | 12.0 | 324.6  | 186.8 | 126.2  | 5.6  |
| DE-000-72       | 90  | 5652  | 1.1  | 0.75706  | 4.0  | 0.09171 | 3.4 | 0.85 | 565.6  | 18.5  | 572.3  | 17.5 | 598.9  | 45.3  | 565.6  | 18.5 |
| DE-000-73       | 294 | 57403 | 1.6  | 24.14767 | 6.6  | 0.66692 | 5.6 | 0.84 | 3294.0 | 144.0 | 3274.4 | 64.8 | 3262.4 | 56.5  | 3262.4 | 56.5 |
| DE-000-74       | 445 | 19124 | 10.0 | 0.55055  | 4.5  | 0.07096 | 3.2 | 0.71 | 442.0  | 13.8  | 445.4  | 16.3 | 462.9  | 70.0  | 442.0  | 13.8 |
| DE-000-75       | 136 | 1756  | 0.9  | 0.12512  | 12.9 | 0.01908 | 3.5 | 0.27 | 121.9  | 4.2   | 119.7  | 14.6 | 77.1   | 296.2 | 121.9  | 4.2  |
| <b>standard</b> | 544 | 38606 | 3.2  | 0.76834  | 1.5  | 0.09431 | 1.0 | 0.69 | 581.0  | 5.6   | 578.8  | 6.5  | 570.3  | 23.3  | 581.0  | 5.6  |
| DE-000-76       | 121 | 2114  | 1.2  | 0.11271  | 17.0 | 0.01984 | 3.0 | 0.18 | 126.7  | 3.8   | 108.4  | 17.5 | -275.6 | 429.2 | 126.7  | 3.8  |
| DE-000-77       | 176 | 2464  | 0.9  | 0.12956  | 13.1 | 0.01946 | 9.8 | 0.75 | 124.2  | 12.1  | 123.7  | 15.3 | 113.8  | 206.2 | 124.2  | 12.1 |
| DE-000-78       | 211 | 12206 | 1.0  | 0.65938  | 4.3  | 0.08262 | 1.8 | 0.41 | 511.7  | 8.6   | 514.2  | 17.3 | 525.3  | 85.8  | 511.7  | 8.6  |
| DE-000-79       | 64  | 3215  | 1.4  | 0.54362  | 19.1 | 0.06603 | 5.9 | 0.31 | 412.2  | 23.4  | 440.8  | 68.4 | 593.2  | 396.8 | 412.2  | 23.4 |
| DE-000-80       | 59  | 22586 | 1.0  | 10.70721 | 2.9  | 0.46930 | 1.5 | 0.54 | 2480.5 | 31.8  | 2498.1 | 26.6 | 2512.3 | 40.5  | 2512.3 | 40.5 |
| <b>standard</b> | 579 | 37443 | 2.6  | 0.70457  | 1.9  | 0.08768 | 1.0 | 0.55 | 541.8  | 5.4   | 541.5  | 7.9  | 540.4  | 34.4  | 541.8  | 5.4  |
| DE-000-81       | 179 | 2315  | 1.2  | 0.14319  | 5.0  | 0.02074 | 2.0 | 0.41 | 132.3  | 2.7   | 135.9  | 6.4  | 198.4  | 106.3 | 132.3  | 2.7  |
| DE-000-82       | 143 | 2288  | 1.6  | 0.14059  | 6.2  | 0.02028 | 3.8 | 0.63 | 129.4  | 4.9   | 133.6  | 7.7  | 208.1  | 111.4 | 129.4  | 4.9  |



|                 |     |       |     |         |      |         |     |      |        |      |        |      |        |       |        |      |
|-----------------|-----|-------|-----|---------|------|---------|-----|------|--------|------|--------|------|--------|-------|--------|------|
| DE-000-83       | 83  | 11915 | 0.9 | 2.51025 | 4.5  | 0.22112 | 4.1 | 0.91 | 1287.8 | 47.5 | 1275.0 | 32.4 | 1253.5 | 35.5  | 1253.5 | 35.5 |
| DE-000-84       | 424 | 45043 | 1.2 | 1.55456 | 5.9  | 0.15271 | 5.8 | 0.97 | 916.1  | 49.4 | 952.3  | 36.7 | 1036.9 | 27.1  | 916.1  | 49.4 |
| <b>standard</b> | 603 | 40817 | 3.3 | 0.73824 | 1.5  | 0.09065 | 1.0 | 0.67 | 559.4  | 5.4  | 561.4  | 6.4  | 569.6  | 24.0  | 559.4  | 5.4  |
| DE-000-86       | 387 | 5587  | 2.4 | 0.13297 | 5.1  | 0.01933 | 3.0 | 0.60 | 123.4  | 3.7  | 126.8  | 6.1  | 190.0  | 95.0  | 123.4  | 3.7  |
| DE-000-87       | 273 | 2101  | 1.3 | 0.10664 | 6.9  | 0.01481 | 3.7 | 0.53 | 94.8   | 3.5  | 102.9  | 6.8  | 294.8  | 134.3 | 94.8   | 3.5  |
| DE-000-88       | 174 | 2553  | 1.6 | 0.13105 | 9.4  | 0.02002 | 6.5 | 0.69 | 127.8  | 8.2  | 125.0  | 11.1 | 72.8   | 162.6 | 127.8  | 8.2  |
| DE-000-89       | 249 | 42006 | 1.3 | 3.89493 | 2.2  | 0.28613 | 1.3 | 0.60 | 1622.2 | 19.1 | 1612.6 | 17.8 | 1600.2 | 32.7  | 1600.2 | 32.7 |
| DE-000-90       | 303 | 3359  | 1.2 | 0.12525 | 6.3  | 0.01895 | 2.3 | 0.36 | 121.0  | 2.8  | 119.8  | 7.2  | 95.6   | 139.6 | 121.0  | 2.8  |
| <b>standard</b> | 676 | 43011 | 3.8 | 0.73346 | 1.8  | 0.09050 | 1.2 | 0.69 | 558.5  | 6.5  | 558.6  | 7.6  | 559.0  | 28.2  | 558.5  | 6.5  |
| DE-000-91       | 125 | 1456  | 1.9 | 0.12719 | 10.1 | 0.01896 | 4.8 | 0.47 | 121.1  | 5.8  | 121.6  | 11.6 | 131.2  | 210.1 | 121.1  | 5.8  |
| DE-000-92       | 278 | 38397 | 0.9 | 3.86645 | 2.1  | 0.28087 | 1.8 | 0.88 | 1595.8 | 25.7 | 1606.7 | 16.8 | 1621.1 | 18.6  | 1621.1 | 18.6 |
| DE-000-93       | 395 | 6734  | 1.2 | 0.23954 | 4.8  | 0.03366 | 3.1 | 0.64 | 213.4  | 6.5  | 218.0  | 9.4  | 268.0  | 84.2  | 213.4  | 6.5  |
| DE-000-94       | 273 | 11990 | 1.7 | 0.59445 | 2.4  | 0.07544 | 2.1 | 0.87 | 468.8  | 9.5  | 473.7  | 9.2  | 497.3  | 26.4  | 468.8  | 9.5  |
| DE-000-95       | 453 | 10648 | 1.8 | 0.30823 | 4.7  | 0.04259 | 3.8 | 0.81 | 268.9  | 10.0 | 272.8  | 11.3 | 306.7  | 62.8  | 268.9  | 10.0 |
| <b>standard</b> | 611 | 36434 | 2.5 | 0.74704 | 1.4  | 0.09226 | 1.0 | 0.71 | 568.9  | 5.4  | 566.5  | 6.2  | 556.9  | 21.9  | 568.9  | 5.4  |
| DE-000-96       | 99  | 1013  | 1.5 | 0.17971 | 16.0 | 0.02113 | 5.0 | 0.32 | 134.8  | 6.7  | 167.8  | 24.7 | 663.5  | 327.0 | 134.8  | 6.7  |
| DE-000-98       | 125 | 2318  | 1.6 | 0.13655 | 7.3  | 0.02076 | 3.9 | 0.53 | 132.4  | 5.1  | 130.0  | 9.0  | 84.9   | 147.7 | 132.4  | 5.1  |
| DE-000-99       | 340 | 31700 | 5.7 | 1.31047 | 3.6  | 0.12768 | 3.0 | 0.84 | 774.6  | 22.1 | 850.3  | 20.8 | 1053.4 | 39.5  | 774.6  | 22.1 |
| DE-000-100      | 101 | 1617  | 0.7 | 0.11059 | 15.2 | 0.01904 | 5.1 | 0.34 | 121.6  | 6.2  | 106.5  | 15.3 | -219.4 | 360.5 | 121.6  | 6.2  |
| <b>standard</b> | 475 | 39231 | 3.5 | 0.76116 | 2.9  | 0.09326 | 1.6 | 0.56 | 574.8  | 9.0  | 574.7  | 12.7 | 574.3  | 52.0  | 574.8  | 9.0  |
| <b>standard</b> | 466 | 41591 | 3.0 | 0.78935 | 2.1  | 0.09641 | 1.9 | 0.88 | 593.3  | 10.5 | 590.8  | 9.5  | 581.2  | 22.0  | 593.3  | 10.5 |
| <b>standard</b> | 671 | 50694 | 3.8 | 0.73006 | 1.8  | 0.09050 | 1.4 | 0.77 | 558.5  | 7.3  | 556.6  | 7.6  | 548.7  | 25.0  | 558.5  | 7.3  |
| <b>standard</b> | 538 | 37476 | 2.7 | 0.73379 | 2.0  | 0.09015 | 1.8 | 0.87 | 556.4  | 9.5  | 558.8  | 8.8  | 568.5  | 21.8  | 556.4  | 9.5  |

Sample DE-540-DZ

|                 |     |        |     |          |      |         |     |      |        |       |        |      |        |       |        |      |
|-----------------|-----|--------|-----|----------|------|---------|-----|------|--------|-------|--------|------|--------|-------|--------|------|
| <b>standard</b> | 618 | 43412  | 3.2 | 0.72517  | 1.6  | 0.09001 | 1.0 | 0.63 | 555.6  | 5.3   | 553.7  | 6.8  | 546.1  | 26.9  | 555.6  | 5.3  |
| <b>standard</b> | 484 | 32435  | 2.9 | 0.73695  | 3.5  | 0.09097 | 2.5 | 0.70 | 561.3  | 13.3  | 560.6  | 15.1 | 558.0  | 54.3  | 561.3  | 13.3 |
| <b>standard</b> | 479 | 36025  | 2.7 | 0.75012  | 2.8  | 0.09151 | 2.1 | 0.74 | 564.5  | 11.2  | 568.3  | 12.2 | 583.5  | 40.6  | 564.5  | 11.2 |
| <b>standard</b> | 614 | 43893  | 2.6 | 0.70616  | 1.6  | 0.08796 | 1.0 | 0.64 | 543.5  | 5.2   | 542.5  | 6.6  | 538.3  | 26.5  | 543.5  | 5.2  |
| <b>standard</b> | 392 | 41356  | 2.9 | 0.80046  | 2.6  | 0.09782 | 1.5 | 0.59 | 601.6  | 8.9   | 597.1  | 11.8 | 579.8  | 46.1  | 601.6  | 8.9  |
| DE0540-DZ-1     | 370 | 5845   | 1.0 | 0.12721  | 6.5  | 0.01798 | 2.7 | 0.41 | 114.9  | 3.1   | 121.6  | 7.4  | 255.1  | 135.6 | 114.9  | 3.1  |
| DE0540-DZ-2     | 305 | 67641  | 1.2 | 3.07781  | 2.4  | 0.24861 | 1.5 | 0.63 | 1431.3 | 19.4  | 1427.2 | 18.3 | 1421.0 | 35.4  | 1421.0 | 35.4 |
| DE0540-DZ-3     | 340 | 5895   | 3.0 | 0.15764  | 4.3  | 0.02143 | 1.9 | 0.45 | 136.7  | 2.6   | 148.6  | 5.9  | 344.2  | 86.1  | 136.7  | 2.6  |
| DE0540-DZ-4     | 393 | 106456 | 1.3 | 5.36215  | 2.8  | 0.34057 | 1.7 | 0.59 | 1889.4 | 27.2  | 1878.8 | 24.0 | 1867.2 | 40.8  | 1867.2 | 40.8 |
| DE0540-DZ-5     | 76  | 1594   | 1.1 | 0.14175  | 19.5 | 0.01845 | 6.3 | 0.32 | 117.9  | 7.4   | 134.6  | 24.5 | 441.0  | 412.9 | 117.9  | 7.4  |
| <b>standard</b> | 447 | 40839  | 2.9 | 0.75716  | 3.3  | 0.09326 | 2.3 | 0.71 | 574.8  | 12.8  | 572.4  | 14.5 | 562.7  | 51.0  | 574.8  | 12.8 |
| DE0540-DZ-6     | 286 | 4457   | 1.3 | 0.12701  | 2.8  | 0.01837 | 1.8 | 0.67 | 117.4  | 2.1   | 121.4  | 3.2  | 201.2  | 48.0  | 117.4  | 2.1  |
| DE0540-DZ-7     | 206 | 12344  | 0.6 | 0.61666  | 5.3  | 0.07473 | 3.5 | 0.67 | 464.6  | 15.9  | 487.8  | 20.4 | 598.1  | 84.4  | 464.6  | 15.9 |
| DE0540-DZ-8     | 242 | 15520  | 1.0 | 1.07141  | 2.9  | 0.11889 | 2.3 | 0.77 | 724.2  | 15.4  | 739.4  | 15.3 | 786.0  | 38.9  | 724.2  | 15.4 |
| DE0540-DZ-9     | 132 | 1910   | 1.0 | 0.14086  | 10.7 | 0.02118 | 3.9 | 0.37 | 135.1  | 5.3   | 133.8  | 13.4 | 110.9  | 235.5 | 135.1  | 5.3  |
| DE0540-DZ-10    | 229 | 24076  | 1.3 | 1.52601  | 2.2  | 0.15794 | 1.9 | 0.89 | 945.3  | 17.0  | 940.9  | 13.4 | 930.5  | 20.5  | 945.3  | 17.0 |
| <b>standard</b> | 558 | 37914  | 3.0 | 0.71300  | 2.2  | 0.08763 | 1.3 | 0.62 | 541.5  | 7.0   | 546.5  | 9.2  | 567.5  | 37.5  | 541.5  | 7.0  |
| DE0540-DZ-11    | 264 | 48126  | 1.0 | 3.58132  | 2.1  | 0.27056 | 1.2 | 0.56 | 1543.6 | 16.3  | 1545.4 | 16.9 | 1547.8 | 33.1  | 1547.8 | 33.1 |
| DE0540-DZ-12    | 103 | 7625   | 0.6 | 0.70448  | 3.2  | 0.08557 | 2.1 | 0.66 | 529.3  | 10.6  | 541.5  | 13.3 | 593.1  | 51.5  | 529.3  | 10.6 |
| DE0540-DZ-13    | 511 | 27978  | 0.8 | 0.53112  | 2.6  | 0.06935 | 2.4 | 0.90 | 432.2  | 9.8   | 432.6  | 9.2  | 434.3  | 25.5  | 432.2  | 9.8  |
| DE0540-DZ-14    | 570 | 44839  | 1.2 | 1.53285  | 6.3  | 0.15685 | 5.6 | 0.90 | 939.2  | 49.3  | 943.6  | 38.5 | 953.9  | 55.7  | 939.2  | 49.3 |
| DE0540-DZ-15    | 383 | 83927  | 1.8 | 6.95099  | 2.0  | 0.38229 | 1.0 | 0.50 | 2087.0 | 17.8  | 2105.2 | 17.7 | 2123.1 | 30.3  | 2123.1 | 30.3 |
| <b>standard</b> | 555 | 42607  | 2.5 | 0.73822  | 2.6  | 0.09068 | 2.4 | 0.89 | 559.6  | 12.6  | 561.4  | 11.4 | 568.6  | 25.9  | 559.6  | 12.6 |
| DE0540-DZ-16    | 442 | 29336  | 2.8 | 1.66242  | 3.3  | 0.16463 | 3.1 | 0.95 | 982.5  | 28.2  | 994.3  | 20.7 | 1020.5 | 20.7  | 1020.5 | 20.7 |
| DE0540-DZ-17    | 538 | 95287  | 2.3 | 4.19032  | 4.5  | 0.29837 | 4.2 | 0.95 | 1683.2 | 62.8  | 1672.1 | 36.5 | 1658.2 | 25.6  | 1658.2 | 25.6 |
| DE0540-DZ-18    | 137 | 17164  | 1.6 | 1.54268  | 2.6  | 0.15720 | 2.0 | 0.76 | 941.2  | 17.4  | 947.6  | 16.2 | 962.4  | 35.0  | 941.2  | 17.4 |
| DE0540-DZ-19    | 324 | 4060   | 0.9 | 0.11134  | 9.0  | 0.01739 | 6.7 | 0.74 | 111.1  | 7.3   | 107.2  | 9.2  | 20.3   | 145.3 | 111.1  | 7.3  |
| DE0540-DZ-20    | 416 | 12983  | 1.7 | 0.29186  | 6.0  | 0.04117 | 4.9 | 0.81 | 260.1  | 12.5  | 260.0  | 13.9 | 259.4  | 81.0  | 260.1  | 12.5 |
| <b>standard</b> | 453 | 52804  | 3.4 | 0.75113  | 4.1  | 0.09268 | 3.8 | 0.94 | 571.4  | 20.9  | 568.9  | 17.8 | 558.9  | 30.8  | 571.4  | 20.9 |
| DE0540-DZ-21    | 77  | 24527  | 1.1 | 9.12114  | 8.0  | 0.44407 | 6.9 | 0.86 | 2368.8 | 136.1 | 2350.2 | 73.0 | 2334.1 | 69.2  | 2334.1 | 69.2 |
| DE0540-DZ-22    | 173 | 43858  | 5.0 | 6.22204  | 3.5  | 0.36607 | 3.3 | 0.96 | 2010.9 | 57.7  | 2007.6 | 30.5 | 2004.1 | 17.8  | 2004.1 | 17.8 |
| DE0540-DZ-23    | 60  | 6583   | 0.6 | 2.05974  | 3.0  | 0.18359 | 1.7 | 0.57 | 1086.6 | 17.0  | 1135.5 | 20.5 | 1230.4 | 48.3  | 1230.4 | 48.3 |
| DE0540-DZ-24    | 664 | 28738  | 0.8 | 0.52320  | 2.1  | 0.06785 | 1.8 | 0.87 | 423.2  | 7.4   | 427.3  | 7.2  | 449.3  | 22.3  | 423.2  | 7.4  |
| DE0540-DZ-25    | 73  | 26617  | 1.1 | 19.68931 | 3.2  | 0.57742 | 3.0 | 0.94 | 2938.2 | 71.8  | 3076.2 | 31.3 | 3167.6 | 17.4  | 3167.6 | 17.4 |
| <b>standard</b> | 373 | 42873  | 3.3 | 0.75754  | 2.5  | 0.09248 | 1.9 | 0.79 | 570.2  | 10.6  | 572.6  | 10.8 | 582.1  | 33.0  | 570.2  | 10.6 |
| DE0540-DZ-26    | 137 | 36111  | 1.0 | 7.09929  | 3.6  | 0.37830 | 3.4 | 0.96 | 2068.3 | 60.3  | 2124.0 | 31.6 | 2178.2 | 17.4  | 2178.2 | 17.4 |
| DE0540-DZ-27    | 281 | 59812  | 0.6 | 4.08950  | 3.0  | 0.29151 | 2.6 | 0.85 | 1649.1 | 37.2  | 1652.2 | 24.4 | 1656.2 | 28.9  | 1656.2 | 28.9 |



|                 |      |        |      |          |      |         |     |      |        |       |        |      |        |       |        |       |
|-----------------|------|--------|------|----------|------|---------|-----|------|--------|-------|--------|------|--------|-------|--------|-------|
| DE0540-DZ-28    | 79   | 9431   | 1.2  | 1.55073  | 3.8  | 0.15475 | 2.0 | 0.54 | 927.6  | 17.6  | 950.8  | 23.4 | 1004.9 | 64.7  | 927.6  | 17.6  |
| DE0540-DZ-29    | 124  | 12944  | 1.1  | 1.50212  | 4.1  | 0.15293 | 2.2 | 0.54 | 917.3  | 19.0  | 931.2  | 25.1 | 964.3  | 70.8  | 917.3  | 19.0  |
| DE0540-DZ-30    | 410  | 15735  | 3.5  | 0.53435  | 3.0  | 0.06929 | 2.7 | 0.91 | 431.8  | 11.3  | 434.7  | 10.6 | 449.8  | 28.1  | 431.8  | 11.3  |
| <b>standard</b> | 412  | 34314  | 3.7  | 0.73217  | 5.0  | 0.09022 | 4.3 | 0.86 | 556.8  | 23.2  | 557.8  | 21.7 | 561.9  | 56.0  | 556.8  | 23.2  |
| DE0540-DZ-31    | 271  | 46180  | 1.0  | 5.85944  | 5.9  | 0.29059 | 5.7 | 0.98 | 1644.5 | 83.4  | 1955.2 | 50.9 | 2302.4 | 20.4  | 2302.4 | 20.4  |
| DE0540-DZ-32    | 287  | 30063  | 1.3  | 1.19401  | 2.7  | 0.13160 | 2.3 | 0.87 | 797.0  | 17.4  | 797.8  | 14.8 | 800.1  | 27.9  | 797.0  | 17.4  |
| DE0540-DZ-33    | 345  | 8216   | 1.2  | 0.29136  | 2.8  | 0.03895 | 1.5 | 0.54 | 246.3  | 3.7   | 259.6  | 6.5  | 381.7  | 54.0  | 246.3  | 3.7   |
| DE0540-DZ-34    | 285  | 1980   | 1.4  | 0.19006  | 16.7 | 0.01736 | 2.6 | 0.15 | 111.0  | 2.8   | 176.7  | 27.0 | 1182.0 | 327.8 | 111.0  | 2.8   |
| DE0540-DZ-35    | 520  | 19683  | 0.9  | 0.67532  | 8.7  | 0.07976 | 3.4 | 0.39 | 494.7  | 16.3  | 523.9  | 35.6 | 653.4  | 172.0 | 494.7  | 16.3  |
| <b>standard</b> | 381  | 28857  | 3.3  | 0.71629  | 5.3  | 0.09013 | 3.4 | 0.64 | 556.3  | 18.2  | 548.5  | 22.6 | 516.1  | 89.7  | 556.3  | 18.2  |
| DE0540-DZ-36    | 128  | 2252   | 0.6  | 0.12385  | 12.8 | 0.01922 | 7.2 | 0.56 | 122.7  | 8.7   | 118.6  | 14.4 | 36.0   | 255.9 | 122.7  | 8.7   |
| DE0540-DZ-38    | 389  | 3976   | 0.4  | 0.12740  | 7.4  | 0.01713 | 4.1 | 0.55 | 109.5  | 4.4   | 121.8  | 8.5  | 368.2  | 140.1 | 109.5  | 4.4   |
| DE0540-DZ-37    | 131  | 6985   | 1.0  | 0.57428  | 4.2  | 0.06990 | 2.9 | 0.70 | 435.6  | 12.4  | 460.8  | 15.6 | 588.4  | 65.5  | 435.6  | 12.4  |
| DE0540-DZ-39    | 455  | 124900 | 7.8  | 10.01249 | 6.6  | 0.41350 | 5.5 | 0.83 | 2230.9 | 102.9 | 2435.9 | 60.8 | 2611.9 | 61.1  | 2611.9 | 61.1  |
| DE0540-DZ-40    | 517  | 108600 | 3.6  | 5.07492  | 5.4  | 0.31876 | 4.3 | 0.79 | 1783.7 | 67.1  | 1831.9 | 46.1 | 1887.2 | 59.6  | 1887.2 | 59.6  |
| <b>standard</b> | 507  | 48293  | 3.5  | 0.78501  | 1.7  | 0.09630 | 1.3 | 0.80 | 592.7  | 7.6   | 588.3  | 7.5  | 571.6  | 22.0  | 592.7  | 7.6   |
| DE0540-DZ-41    | 433  | 24163  | 1.2  | 0.56669  | 6.2  | 0.07034 | 3.4 | 0.54 | 438.2  | 14.3  | 455.9  | 22.8 | 546.0  | 114.2 | 438.2  | 14.3  |
| DE0540-DZ-42    | 59   | 23109  | 1.7  | 9.65203  | 5.5  | 0.44359 | 3.9 | 0.70 | 2366.7 | 77.3  | 2402.1 | 51.0 | 2432.3 | 66.6  | 2432.3 | 66.6  |
| DE0540-DZ-43    | 300  | 12106  | 0.8  | 0.69702  | 5.1  | 0.07956 | 3.0 | 0.60 | 493.5  | 14.4  | 537.0  | 21.2 | 726.3  | 86.4  | 493.5  | 14.4  |
| DE0540-DZ-44    | 312  | 14980  | 0.9  | 0.38748  | 5.4  | 0.05197 | 3.5 | 0.65 | 326.6  | 11.1  | 332.5  | 15.3 | 374.1  | 92.8  | 326.6  | 11.1  |
| DE0540-DZ-45    | 142  | 25425  | 1.2  | 2.19560  | 4.6  | 0.19606 | 2.1 | 0.45 | 1154.1 | 21.8  | 1179.6 | 32.0 | 1226.8 | 80.6  | 1226.8 | 80.6  |
| <b>standard</b> | 393  | 33180  | 3.6  | 0.74235  | 2.9  | 0.09119 | 1.2 | 0.43 | 562.6  | 6.7   | 563.8  | 12.5 | 568.7  | 56.6  | 562.6  | 6.7   |
| DE0540-DZ-46    | 704  | 11598  | 1.4  | 0.19249  | 2.2  | 0.02691 | 1.5 | 0.67 | 171.2  | 2.5   | 178.8  | 3.6  | 280.4  | 37.1  | 171.2  | 2.5   |
| DE0540-DZ-47    | 362  | 42424  | 2.5  | 1.73200  | 2.6  | 0.17214 | 2.2 | 0.84 | 1023.9 | 20.7  | 1020.5 | 16.8 | 1013.2 | 28.8  | 1013.2 | 28.8  |
| DE0540-DZ-48    | 640  | 35631  | 2.5  | 0.90046  | 2.1  | 0.10643 | 1.8 | 0.86 | 652.0  | 11.0  | 652.0  | 9.9  | 652.0  | 22.6  | 652.0  | 11.0  |
| DE0540-DZ-49    | 516  | 15495  | 1.9  | 0.32746  | 2.0  | 0.04609 | 1.7 | 0.82 | 290.5  | 4.7   | 287.6  | 5.1  | 264.6  | 27.0  | 290.5  | 4.7   |
| DE0540-DZ-50    | 355  | 59513  | 1.0  | 4.19781  | 4.2  | 0.27701 | 3.8 | 0.91 | 1576.3 | 52.9  | 1673.6 | 34.2 | 1797.8 | 32.0  | 1797.8 | 32.0  |
| <b>standard</b> | 552  | 45494  | 2.6  | 0.72941  | 2.1  | 0.09026 | 1.6 | 0.78 | 557.1  | 8.7   | 556.2  | 8.9  | 552.7  | 28.6  | 557.1  | 8.7   |
| DE0540-DZ-51    | 182  | 20617  | 1.1  | 1.55684  | 3.1  | 0.16108 | 2.7 | 0.86 | 962.8  | 23.8  | 953.2  | 19.2 | 931.2  | 32.6  | 962.8  | 23.8  |
| DE0540-DZ-52    | 270  | 28098  | 0.9  | 1.50299  | 3.4  | 0.15531 | 3.1 | 0.91 | 930.7  | 26.7  | 931.6  | 20.6 | 933.8  | 28.2  | 930.7  | 26.7  |
| DE0540-DZ-53    | 179  | 19421  | 2.0  | 1.29158  | 8.0  | 0.14138 | 7.2 | 0.90 | 852.5  | 57.4  | 842.0  | 45.6 | 814.4  | 71.6  | 852.5  | 57.4  |
| DE0540-DZ-54    | 157  | 8290   | 0.3  | 0.63517  | 4.0  | 0.08134 | 2.1 | 0.51 | 504.1  | 10.1  | 499.3  | 15.9 | 477.4  | 76.7  | 504.1  | 10.1  |
| DE0540-DZ-55    | 387  | 20552  | 1.1  | 0.70843  | 4.7  | 0.08760 | 3.5 | 0.75 | 541.3  | 18.2  | 543.8  | 19.6 | 554.2  | 66.6  | 541.3  | 18.2  |
| <b>standard</b> | 577  | 49940  | 3.3  | 0.74004  | 1.7  | 0.09127 | 1.1 | 0.65 | 563.1  | 6.1   | 562.4  | 7.5  | 559.8  | 28.8  | 563.1  | 6.1   |
| DE0540-DZ-56    | 66   | 10529  | 1.7  | 3.19509  | 3.5  | 0.25462 | 2.9 | 0.83 | 1462.3 | 38.1  | 1456.0 | 27.0 | 1446.8 | 36.8  | 1446.8 | 36.8  |
| DE0540-DZ-57    | 586  | 70843  | 1.8  | 1.66597  | 3.0  | 0.16616 | 2.7 | 0.93 | 990.9  | 25.1  | 995.7  | 18.7 | 1006.1 | 22.7  | 990.9  | 25.1  |
| DE0540-DZ-58    | 348  | 32394  | 2.3  | 1.74669  | 5.1  | 0.17360 | 4.8 | 0.95 | 1031.9 | 45.8  | 1025.9 | 32.7 | 1013.2 | 31.9  | 1013.2 | 31.9  |
| DE0540-DZ-59    | 151  | 2225   | 1.4  | 0.12740  | 19.4 | 0.01809 | 7.7 | 0.40 | 115.6  | 8.8   | 121.8  | 22.3 | 244.2  | 413.3 | 115.6  | 8.8   |
| DE0540-DZ-60    | 317  | 70886  | 1.3  | 8.05588  | 2.9  | 0.36654 | 2.7 | 0.91 | 2013.1 | 46.0  | 2237.3 | 26.3 | 2449.3 | 20.0  | 2449.3 | 20.0  |
| <b>standard</b> | 291  | 33677  | 3.3  | 0.75738  | 5.1  | 0.09277 | 4.9 | 0.97 | 571.9  | 27.1  | 572.5  | 22.4 | 574.7  | 29.0  | 571.9  | 27.1  |
| DE0540-DZ-61    | 148  | 12897  | 0.6  | 1.10864  | 3.2  | 0.12350 | 2.5 | 0.78 | 750.7  | 17.8  | 757.5  | 17.2 | 777.8  | 42.4  | 750.7  | 17.8  |
| DE0540-DZ-62    | 150  | 14003  | 1.0  | 1.27829  | 3.5  | 0.13635 | 2.7 | 0.76 | 824.0  | 20.5  | 836.1  | 20.0 | 868.3  | 47.6  | 824.0  | 20.5  |
| DE0540-DZ-63    | 63   | 19880  | 1.2  | 12.46642 | 3.0  | 0.50749 | 2.4 | 0.80 | 2645.9 | 52.8  | 2640.2 | 28.5 | 2635.8 | 29.9  | 2635.8 | 29.9  |
| DE0540-DZ-64    | 1055 | 25920  | 1.6  | 0.31447  | 3.0  | 0.04286 | 1.7 | 0.55 | 270.6  | 4.4   | 277.6  | 7.3  | 337.7  | 57.4  | 270.6  | 4.4   |
| DE0540-DZ-65    | 673  | 187315 | 13.4 | 9.99016  | 1.8  | 0.45170 | 1.5 | 0.84 | 2402.8 | 30.6  | 2433.9 | 16.8 | 2459.9 | 16.9  | 2459.9 | 16.9  |
| <b>standard</b> | 526  | 48088  | 3.2  | 0.75934  | 2.4  | 0.09279 | 1.8 | 0.74 | 572.0  | 9.6   | 573.6  | 10.3 | 580.0  | 34.2  | 572.0  | 9.6   |
| DE0540-DZ-67    | 120  | 17463  | 1.6  | 1.66848  | 8.0  | 0.16352 | 5.7 | 0.71 | 976.3  | 51.7  | 996.6  | 51.1 | 1041.5 | 114.3 | 1041.5 | 114.3 |
| DE0540-DZ-68    | 141  | 63103  | 1.5  | 15.25546 | 9.5  | 0.53801 | 8.7 | 0.92 | 2775.1 | 196.8 | 2831.3 | 90.4 | 2871.6 | 59.4  | 2871.6 | 59.4  |
| DE0540-DZ-69    | 290  | 27700  | 2.3  | 0.83510  | 3.8  | 0.10013 | 2.7 | 0.70 | 615.2  | 15.7  | 616.4  | 17.6 | 621.0  | 58.5  | 615.2  | 15.7  |
| DE0540-DZ-70    | 119  | 50892  | 1.5  | 5.84154  | 5.7  | 0.35930 | 4.6 | 0.80 | 1978.9 | 78.5  | 1952.6 | 49.8 | 1924.8 | 61.3  | 1924.8 | 61.3  |
| <b>standard</b> | 515  | 39488  | 3.0  | 0.67658  | 2.4  | 0.08557 | 1.1 | 0.47 | 529.3  | 5.8   | 524.7  | 9.9  | 504.7  | 46.9  | 529.3  | 5.8   |
| DE0540-DZ-72    | 170  | 48383  | 0.4  | 4.97129  | 4.1  | 0.32531 | 3.3 | 0.82 | 1815.6 | 52.7  | 1814.5 | 34.5 | 1813.1 | 42.9  | 1813.1 | 42.9  |
| DE0540-DZ-73    | 184  | 7881   | 0.6  | 0.39065  | 5.2  | 0.05181 | 2.5 | 0.48 | 325.6  | 8.0   | 334.8  | 14.9 | 399.5  | 102.5 | 325.6  | 8.0   |
| DE0540-DZ-74    | 953  | 33282  | 5.8  | 2.67308  | 8.3  | 0.19421 | 7.6 | 0.91 | 1144.1 | 79.4  | 1321.0 | 61.2 | 1620.8 | 62.2  | 1620.8 | 62.2  |
| DE0540-DZ-75    | 458  | 32405  | 2.0  | 2.58167  | 7.1  | 0.20516 | 6.2 | 0.88 | 1203.0 | 68.3  | 1295.5 | 51.7 | 1452.1 | 63.0  | 1452.1 | 63.0  |
| <b>standard</b> | 388  | 27758  | 3.1  | 0.75478  | 3.4  | 0.09308 | 1.0 | 0.30 | 573.7  | 5.5   | 571.0  | 14.7 | 560.1  | 70.0  | 573.7  | 5.5   |
| DE0540-DZ-76    | 105  | 8902   | 57.2 | 0.85502  | 5.7  | 0.09878 | 3.7 | 0.64 | 607.2  | 21.4  | 627.4  | 26.9 | 700.7  | 93.7  | 607.2  | 21.4  |
| DE0540-DZ-77    | 205  | 7258   | 1.0  | 0.34553  | 12.9 | 0.04294 | 5.9 | 0.46 | 271.0  | 15.7  | 301.4  | 33.6 | 543.4  | 251.0 | 271.0  | 15.7  |
| DE0540-DZ-78    | 64   | 5155   | 52.5 | 0.72012  | 8.9  | 0.07833 | 6.2 | 0.69 | 486.1  | 28.9  | 550.7  | 37.7 | 827.8  | 133.3 | 486.1  | 28.9  |
| DE0540-DZ-79    | 89   | 34460  | 0.8  | 10.17311 | 3.6  | 0.46347 | 2.7 | 0.75 | 2454.9 | 55.2  | 2450.6 | 33.5 | 2447.1 | 40.8  | 2447.1 | 40.8  |
| DE0540-DZ-80    | 131  | 28061  | 1.0  | 2.24465  | 3.5  | 0.20195 | 1.5 | 0.43 | 1185.8 | 16.4  | 1195.1 | 24.9 | 1212.0 | 63.2  | 1212.0 | 63.2  |
| <b>standard</b> | 568  | 45345  | 2.5  | 0.73085  | 1.4  | 0.09011 | 1.0 | 0.70 | 556.2  | 5.3   | 557.0  | 6.2  | 560.4  | 22.5  | 556.2  | 5.3   |



|                 |     |        |      |          |     |         |     |      |        |      |        |      |        |       |        |      |
|-----------------|-----|--------|------|----------|-----|---------|-----|------|--------|------|--------|------|--------|-------|--------|------|
| DE0540-DZ-81    | 308 | 42585  | 2.1  | 3.68802  | 8.4 | 0.23229 | 7.7 | 0.92 | 1346.5 | 93.8 | 1568.8 | 67.1 | 1882.2 | 58.9  | 1882.2 | 58.9 |
| DE0540-DZ-82    | 264 | 60607  | 1.6  | 4.65077  | 3.1 | 0.31207 | 3.0 | 0.95 | 1750.9 | 45.6 | 1758.4 | 26.2 | 1767.4 | 18.3  | 1767.4 | 18.3 |
| DE0540-DZ-83    | 215 | 3504   | 0.7  | 0.16795  | 9.0 | 0.02135 | 2.9 | 0.33 | 136.2  | 4.0  | 157.6  | 13.2 | 493.7  | 188.7 | 136.2  | 4.0  |
| DE0540-DZ-84    | 980 | 21043  | 0.9  | 0.17226  | 1.8 | 0.02500 | 1.4 | 0.81 | 159.2  | 2.3  | 161.4  | 2.6  | 194.1  | 23.9  | 159.2  | 2.3  |
| DE0540-DZ-85    | 62  | 18238  | 0.7  | 5.19103  | 1.9 | 0.33051 | 1.6 | 0.82 | 1840.9 | 25.3 | 1851.1 | 16.3 | 1862.7 | 19.6  | 1862.7 | 19.6 |
| <b>standard</b> | 593 | 54158  | 3.2  | 0.73034  | 1.5 | 0.09000 | 1.0 | 0.65 | 555.6  | 5.3  | 556.8  | 6.6  | 561.6  | 25.5  | 555.6  | 5.3  |
| DE0540-DZ-86    | 797 | 237535 | 14.9 | 5.02054  | 3.1 | 0.32701 | 1.9 | 0.60 | 1823.9 | 29.8 | 1822.8 | 26.6 | 1821.5 | 45.7  | 1821.5 | 45.7 |
| DE0540-DZ-87    | 467 | 5668   | 0.9  | 0.14234  | 8.0 | 0.01764 | 2.7 | 0.34 | 112.7  | 3.0  | 135.1  | 10.1 | 549.1  | 163.6 | 112.7  | 3.0  |
| DE0540-DZ-88    | 196 | 49151  | 1.0  | 3.11711  | 2.1 | 0.25006 | 1.7 | 0.78 | 1438.8 | 21.6 | 1436.9 | 16.5 | 1434.2 | 25.6  | 1434.2 | 25.6 |
| DE0540-DZ-89    | 150 | 62269  | 2.0  | 10.48715 | 5.0 | 0.46917 | 4.0 | 0.80 | 2479.9 | 82.2 | 2478.8 | 46.3 | 2477.8 | 50.6  | 2477.8 | 50.6 |
| DE0540-DZ-90    | 214 | 41821  | 1.1  | 2.35944  | 3.3 | 0.20553 | 2.8 | 0.83 | 1204.9 | 30.5 | 1230.4 | 23.9 | 1275.3 | 36.7  | 1275.3 | 36.7 |
| <b>standard</b> | 251 | 30481  | 3.2  | 0.77931  | 9.5 | 0.09457 | 7.1 | 0.75 | 582.5  | 39.7 | 585.1  | 42.4 | 595.0  | 136.7 | 582.5  | 39.7 |
| DE0540-DZ-91    | 258 | 74050  | 1.6  | 8.91743  | 3.8 | 0.39679 | 3.3 | 0.89 | 2154.3 | 61.2 | 2329.6 | 34.3 | 2487.0 | 29.0  | 2487.0 | 29.0 |
| DE0540-DZ-92    | 336 | 58022  | 1.5  | 2.76457  | 3.1 | 0.23468 | 2.2 | 0.71 | 1359.0 | 26.8 | 1346.0 | 23.2 | 1325.4 | 42.6  | 1325.4 | 42.6 |
| DE0540-DZ-93    | 233 | 56003  | 1.6  | 4.56252  | 4.4 | 0.31265 | 4.1 | 0.92 | 1753.8 | 62.4 | 1742.4 | 36.7 | 1728.9 | 31.0  | 1728.9 | 31.0 |
| DE0540-DZ-94    | 125 | 17000  | 0.4  | 1.99383  | 2.6 | 0.18120 | 1.5 | 0.58 | 1073.5 | 14.7 | 1113.4 | 17.3 | 1192.2 | 41.1  | 1192.2 | 41.1 |
| DE0540-DZ-95    | 156 | 4649   | 0.9  | 0.25970  | 6.4 | 0.03548 | 2.3 | 0.36 | 224.7  | 5.1  | 234.4  | 13.4 | 332.6  | 136.0 | 224.7  | 5.1  |
| <b>standard</b> | 452 | 39721  | 3.5  | 0.74649  | 4.0 | 0.09151 | 2.7 | 0.66 | 564.5  | 14.5 | 566.2  | 17.5 | 573.1  | 65.7  | 564.5  | 14.5 |
| DE0540-DZ-96    | 324 | 117295 | 2.3  | 5.26117  | 3.5 | 0.33772 | 2.7 | 0.78 | 1875.7 | 43.7 | 1862.6 | 29.5 | 1847.9 | 39.4  | 1847.9 | 39.4 |
| DE0540-DZ-97    | 271 | 37062  | 1.3  | 1.80090  | 8.4 | 0.16110 | 7.7 | 0.91 | 962.9  | 68.6 | 1045.8 | 55.2 | 1223.3 | 69.6  | 1223.3 | 69.6 |
| DE0540-DZ-98    | 592 | 76173  | 5.1  | 1.46474  | 2.6 | 0.15427 | 2.1 | 0.81 | 924.8  | 17.8 | 916.0  | 15.4 | 894.6  | 31.2  | 924.8  | 17.8 |
| DE0540-DZ-99    | 121 | 31026  | 0.3  | 5.75247  | 1.5 | 0.34227 | 1.1 | 0.73 | 1897.6 | 17.7 | 1939.3 | 12.7 | 1984.2 | 17.8  | 1984.2 | 17.8 |
| DE0540-DZ-100   | 539 | 44348  | 0.8  | 0.81603  | 2.1 | 0.09866 | 1.7 | 0.84 | 606.6  | 10.1 | 605.8  | 9.4  | 603.0  | 24.0  | 606.6  | 10.1 |
| <b>standard</b> | 532 | 58674  | 3.3  | 0.70534  | 4.1 | 0.08828 | 2.8 | 0.68 | 545.4  | 14.5 | 542.0  | 17.1 | 527.7  | 65.3  | 545.4  | 14.5 |
| <b>standard</b> | 415 | 38773  | 2.7  | 0.74831  | 3.3 | 0.09314 | 2.0 | 0.61 | 574.1  | 11.2 | 567.2  | 14.4 | 539.8  | 57.4  | 574.1  | 11.2 |
| <b>standard</b> | 235 | 28166  | 3.3  | 0.80853  | 6.5 | 0.09583 | 5.2 | 0.80 | 589.9  | 29.1 | 601.6  | 29.3 | 645.9  | 83.2  | 589.9  | 29.1 |
| <b>standard</b> | 588 | 49907  | 3.2  | 0.71381  | 2.1 | 0.08851 | 1.7 | 0.81 | 546.7  | 9.1  | 547.0  | 9.1  | 548.1  | 27.3  | 546.7  | 9.1  |
| <b>standard</b> | 451 | 40122  | 2.8  | 0.75005  | 3.0 | 0.09173 | 2.2 | 0.73 | 565.7  | 11.8 | 568.3  | 12.9 | 578.3  | 43.5  | 565.7  | 11.8 |

- Analyses with >10% uncertainty (1-sigma) in  $^{206}\text{Pb}/^{238}\text{U}$  age are not included.
- Analyses with >10% uncertainty (1-sigma) in  $^{206}\text{Pb}/^{207}\text{Pb}$  age are not included, unless  $^{206}\text{Pb}/^{238}\text{U}$  age is <500 Ma.
- Best age is determined from  $^{206}\text{Pb}/^{238}\text{U}$  age for analyses with  $^{206}\text{Pb}/^{238}\text{U}$  age <1000 Ma and from  $^{206}\text{Pb}/^{207}\text{Pb}$  age for analyses with  $^{206}\text{Pb}/^{238}\text{U}$  age > 1000 Ma.
- Concordance is based on  $^{206}\text{Pb}/^{238}\text{U}$  age /  $^{206}\text{Pb}/^{207}\text{Pb}$  age. Value is not reported for  $^{206}\text{Pb}/^{238}\text{U}$  ages <500 Ma because of large uncertainty in  $^{206}\text{Pb}/^{207}\text{Pb}$  age.
- Analyses with  $^{206}\text{Pb}/^{238}\text{U}$  age > 500 Ma and with >20% discordance (<80% concordance) are not included.
- Analyses with  $^{206}\text{Pb}/^{238}\text{U}$  age > 500 Ma and with >5% reverse discordance (<105% concordance) are not included.
- All uncertainties are reported at the 1-sigma level, and include only measurement errors.
- Systematic errors are as follows (at 2-sigma level): [sample 1: 2.5% ( $^{206}\text{Pb}/^{238}\text{U}$ ) & 1.4% ( $^{206}\text{Pb}/^{207}\text{Pb}$ )] These values are reported on cells U1 and W1 of NUagecalc.
- Analyses conducted by LA-MC-ICPMS, as described by Gehrels et al. (2008).
